# Supplementary material for: Seasonal Differences of Gene Expression Profiles in Song Sparrow (Melospiza melodia) Hypothalamus in Relation to Territorial Aggression
Source: PubMed Central journal article supplement (PMC2780717; doi:10.1371/journal.pone.0008182), 2009-12-04
Supplement: pone.0008182.s001.pdf [file pone.0008182.s001.pdf]

| Spot ID           | UniGene ID | HGNC_symbol | Gene Description                                           | Fold Change<br>AC vs. SC | T<br>Statistics | df    | P-value |
|-------------------|------------|-------------|------------------------------------------------------------|--------------------------|-----------------|-------|---------|
| SB02006A2H05.f1   | Gga.28520  | CGA         | Glycoprotein hormones alpha chain precursor                | -15.96                   | -10.16          | 29.26 | 0.0000  |
| SB03032A2G07.f1   | Gga.1079   | CRYM        | Mu-crystallin homolog                                      | -2.85                    | -4.41           | 29.26 | 0.0001  |
| SB03046B1C04.f1   | Gga.1079   | CRYM        | Mu-crystallin homolog                                      | -2.73                    | -4.81           | 29.26 | 0.0000  |
| SB03047B2E11.f1   | Gga.1079   | CRYM        | Mu-crystallin homolog                                      | -2.61                    | -4.33           | 29.26 | 0.0002  |
| SB02007A1D12.f1   | Gga.2898   | SMTN        | Smoothelin-like protein 1                                  | -1.83                    | -5.98           | 29.26 | 0.0000  |
| SB02003B1B05.f1   |            |             |                                                            | -1.71                    | -3.42           | 29.26 | 0.0019  |
| SB03021B2C08.f1   |            |             |                                                            | -1.57                    | -3.56           | 29.26 | 0.0013  |
| SB03038A2F11.f1   | Gga.4000   | CHRNA7      | cholinergic receptor, nicotinic, alpha 7                   | -1.54                    | -4.24           | 29.26 | 0.0002  |
| SB02003A2D09.f2   | Gga.4605   | HNRPD       | Heterogeneous nuclear ribonucleoprotein A/B                | -1.53                    | -4.25           | 29.26 | 0.0002  |
| SB03043B1D06.f1   | Gga.33813  | VLLH2748    | Similar to VLLH2748                                        | -1.53                    | -3.79           | 29.26 | 0.0007  |
| SB03042A1D05.f1   | Gga.666    | VIP         | VIP peptides precursor                                     | -1.47                    | -4.33           | 29.26 | 0.0002  |
| SB01002000D02.B   | Gga.14972  | LRRC3B      | Leucine-rich repeat-containing protein 3B precursor        | -1.47                    | -2.91           | 29.26 | 0.0069  |
| SB03009B1E07.f1   | Gga.18849  | CD109       | CD109 molecule                                             | -1.45                    | -3.71           | 28.26 | 0.0009  |
| SB010007000A12    | Gga.23653  | UBR3        | biquitin protein ligase E3 component n-recogin 3           | -1.44                    | -2.84           | 29.26 | 0.0080  |
| SB02040B1D06.f1   | Gga.9399   | YOD1        | HIV-induced protein-7-like protease, partial               | -1.44                    | -2.95           | 29.26 | 0.0062  |
| SB02031B2F04.f1   |            |             |                                                            | -1.43                    | -3.97           | 29.26 | 0.0004  |
| SB03009B1A11.f1   | Gga.12655  | TRAF3       | TNF receptor-associated factor 3                           | -1.40                    | -3.26           | 29.26 | 0.0028  |
| SB03046A1G06.f1   | Gga.9559   | CTTNBP2NL   | CTTNBP2 N-terminal like                                    | -1.39                    | -2.81           | 29.26 | 0.0087  |
| SB03025A1D09.f2   | Gga.4502   | SFRS5       | Splicing factor, arginine/serine-rich 5                    | -1.39                    | -2.97           | 29.26 | 0.0059  |
| SB02030A2H08.f1   | Gga.24273  | CDH13       | Cadherin-13 precursor                                      | -1.38                    | -2.95           | 29.26 | 0.0062  |
| SB02031A1B02.f1   | Gga.9946   | C22orf32    | Chromosome 22 open reading frame 32                        | -1.38                    | -2.91           | 29.26 | 0.0068  |
| SB010023000C07    | Gga.4845   | SFRS5       | Splicing factor, arginine/serine-rich 5                    | -1.37                    | -3.29           | 29.26 | 0.0026  |
| SB02013B1B11.f1   | Gga.12888  | HIPK2       | Homeodomain interacting protein kinase 2                   | -1.36                    | -3.01           | 29.26 | 0.0054  |
| SB03037B2G11.f1   | Gga.6172   | INPP5F      | inositol polyphos-5-phosphatase F 1                        | -1.35                    | -4.43           | 29.26 | 0.0001  |
| SB03046A1H05.f1   | Gga.7811   | NME6        | Non-metastatic cells 6                                     | -1.35                    | -3.76           | 29.26 | 0.0008  |
| SB03023B1C06.f1   | Gga.22158  | NACC2       | BTB (POZ) domain containing 14A                            | -1.34                    | -3.25           | 29.26 | 0.0029  |
| SB02032A1G02.f2   | Gga.27049  | OPRL1       | TC199994                                                   | -1.34                    | -3.35           | 29.26 | 0.0022  |
| SB02038A2A01.f1   | Gga.11999  | SCG2        | Secretogranin-2 precursor                                  | -1.34                    | -3.15           | 29.26 | 0.0038  |
| SB03048B2H12.f1   | Gga.33929  | MAP4        | Microtubule-associated protein 4                           | -1.33                    | -3.28           | 29.26 | 0.0027  |
| SB03003A1E08.f1   | Gga.20687  | PLA2G10     | Group X secretory phospholipase A2 precursor               | -1.33                    | -2.83           | 28.26 | 0.0084  |
| SB03020A2H12.f1   | Hs.513695  | PDXDC2      | Pyridoxal-dependent decarboxylase domain containing 2      | -1.33                    | -2.95           | 29.26 | 0.0062  |
| SB03005B1G10.f1   |            |             |                                                            | -1.32                    | -3.57           | 29.26 | 0.0013  |
| SB03003A2B07.f1   | Gga.33929  | MAP4        | Microtubule-associated protein 4                           | -1.32                    | -3.17           | 29.26 | 0.0036  |
| SB03018B2F04.f1   | Gga.8855   | USP32       | Ubiquitin specific peptidase 32                            | -1.32                    | -2.81           | 29.26 | 0.0087  |
| SB010014000A06    | Gga.742    | SST         | Somatostatin precursor                                     | -1.31                    | -3.80           | 29.26 | 0.0007  |
| SB02014A1G07.f2   | Gga.33766  | MAN2A2      | Alpha-mannosidase IIx                                      | -1.31                    | -2.86           | 29.26 | 0.0078  |
| SB02031B2D01.f1   | Hs.501857  | DENND5A     | DENN/MADD domain containing 5A                             | -1.30                    | -3.20           | 29.26 | 0.0033  |
| SB02008A1G03.f1   | Gga.15322  | MAPT        | Microtubule-associated protein tau                         | -1.30                    | -2.85           | 29.26 | 0.0080  |
| SB03040B2B03.f1   | Gga.33916  | GLRA2       | Glycine receptor alpha-2* chain precursor                  | -1.29                    | -2.95           | 29.26 | 0.0062  |
| SB03021B1F10.f1   | Gga.10260  | SF4         | Splicing factor 4                                          | -1.28                    | -3.10           | 29.26 | 0.0043  |
| SB03006B1A06.f1   | Gga.29178  | LACE1       | Lactation elevated 1                                       | -1.28                    | -3.41           | 29.26 | 0.0019  |
| SB03025B1G06.f2   |            |             |                                                            | -1.28                    | -2.82           | 29.26 | 0.0086  |
| SB03010B1A01.f1   | Gga.767    | MTNR1B      | Melatonin receptor 1B                                      | -1.28                    | -2.84           | 29.26 | 0.0080  |
| SB010005001E09    | Gga.28965  | SPOP        | Speckle-type POZ protein                                   | -1.28                    | -3.24           | 29.26 | 0.0030  |
| SB02044A2A04.f1   |            |             |                                                            | -1.27                    | -3.16           | 29.26 | 0.0037  |
| SB03023A1G03.f1   |            |             |                                                            | -1.27                    | -2.81           | 29.26 | 0.0088  |
| SB010021000E01    | Gga.10727  | PAPSS1      | Bifunctional 3'-phosphoadenosine 5'-phos                   | -1.27                    | -3.17           | 29.26 | 0.0036  |
| SB02023A2E06.f1   | Gga.33945  | SETD8       | Glioma tumor suppressor candidate region                   | -1.27                    | -2.89           | 29.26 | 0.0072  |
| SB03003A1E11.f1   | Gga.17826  | OXCT1       | 3oxoacid CoA transferase 1                                 | -1.27                    | -4.20           | 29.26 | 0.0002  |
| SB03011B2D10.f1   | Gga.25774  | HS3ST5      | Heparan sulfate glucosamine 3-O-sulfotransferase 5         | -1.27                    | -2.78           | 29.26 | 0.0095  |
| SB02041A2A05.f1   | Gga.4317   | CACNA1B     | N-type calcium channel alpha-1B cdB1 variant               | -1.27                    | -3.00           | 26.26 | 0.0059  |
| SB03044B1H02.f1   | Gga.14699  | SH3D19      | SH3 domain protein D19                                     | -1.27                    | -2.91           | 29.26 | 0.0069  |
| SB02044B2C12.f1   | Gga.23874  | RASGRF1     | RAS protein-specific guanine nucleotide-releasing factor 1 | -1.27                    | -3.10           | 29.26 | 0.0043  |
| SB02048B2H01.f1   | Gga.5775   | HNRNPA3     | Heterogeneous nuclear ribonucleoprotein A3                 | -1.27                    | -4.25           | 29.26 | 0.0002  |
| SB03050B2D06.f1   | Hs.715029  | MFSD6       | Major facilitator superfamily domain containing 6          | -1.26                    | -2.97           | 29.26 | 0.0058  |
| SB03045B2F12.f1   | Gga.616    | ADCYAP1     | Adenylate cyclase activating polypeptide 1                 | -1.26                    | -2.82           | 29.26 | 0.0085  |
| SB02026B2F01.f1   | Gga.13325  | FBXO9       | F-box only protein 9                                       | -1.26                    | -3.08           | 29.26 | 0.0044  |
| SB02038B2E05.f1   | Gga.39962  | CLCC1       | Chloride channel CLIC-like protein 1 Precursor             | -1.26                    | -2.84           | 29.26 | 0.0082  |
| SB03047B2B10.f1   | Gga.42978  | MYCBPAP     | MYCBP associated protein                                   | -1.26                    | -3.07           | 29.26 | 0.0046  |
| SB02040B2H08.f1   | Gga.11578  | GDI2        | Rab GDP dissociation inhibitor beta                        | -1.26                    | -3.44           | 29.26 | 0.0018  |
| SB03018B1E05.f1   | Gga.43262  | POMT2       | Protein-O-mannosyltransferase 2                            | -1.26                    | -3.33           | 29.26 | 0.0023  |
| SB03026A2F12.f1   | Gga.39754  | RNMTL1      | Double C2-like domain containing protein                   | -1.26                    | -2.87           | 29.26 | 0.0076  |
| SB03026B1G01.f1   | Gga.22590  | PGRMC1      | Progesterone receptor membrane component 1                 | -1.25                    | -2.79           | 29.26 | 0.0092  |
| SB02023B2H03.f1   | Gga.4000   | CHRNA7      | Cholinergic receptor, nicotinic, alpha 7                   | -1.25                    | -2.85           | 29.26 | 0.0079  |
| SB03045A2D08.f1   |            |             |                                                            | -1.25                    | -3.02           | 29.26 | 0.0052  |
| SB02027B2E04.f1   | Gga.9984   | NBR1        | Next to BRCA1 gene 1 protein                               | -1.25                    | -3.51           | 29.26 | 0.0015  |
| SB02035B2A03.f1   | Mm.93335   | OMG         | Oligodendrocyte myelin glycoprotein                        | -1.25                    | -3.65           | 29.26 | 0.0010  |
| SB03013B1B03.f1   | Gga.26211  | FAM89A      | Dihydroxyacetone phosphate acyltransferase                 | -1.25                    | -3.19           | 29.26 | 0.0034  |
| SB02023A2E11.f1   | Gga.42839  | INSR        | Insulin receptor                                           | -1.25                    | -2.81           | 29.26 | 0.0088  |
| SB02027B1G10.f1   | Gga.6131   | KPNA3       | Karyopherin alpha 3 subunit                                | -1.25                    | -3.09           | 29.26 | 0.0044  |
| SB02007A2F11.f1   | Gga.1785   | GPR177      | G protein-coupled receptor 177                             | -1.25                    | -2.80           | 29.26 | 0.0090  |
| SB02020B2H10.f1   | Hs.486361  | RLBP1L2     | Retinaldehyde binding protein 1-like 2                     | -1.24                    | -2.93           | 29.26 | 0.0066  |
| SB02007B2D06.f1.A |            |             |                                                            | -1.24                    | -2.96           | 29.26 | 0.0060  |
| SB03044B1B07.f1   | Gga.21204  | HSPA4L      | Heat shock 70kDa protein 4-like                            | -1.24                    | -3.16           | 29.26 | 0.0037  |
| SB02046A2F04.f1   |            |             |                                                            | -1.24                    | -2.79           | 29.26 | 0.0093  |
| SB03050A1H10.f1   | Gga.23309  | CACNB2      | Voltage-dependent L-type calcium channel                   | -1.24                    | -3.08           | 29.26 | 0.0045  |
| SB02042A2G12.f1   | Gga.2749   | ZNF462      | Zinc finger protein 462                                    | -1.23                    | -3.00           | 29.26 | 0.0055  |
| SB02013B2B10.f1   | Gga.4933   | HIF1A       | Hypoxia-inducible factor 1, alpha subunit                  | -1.23                    | -2.95           | 29.26 | 0.0062  |
| SB03013A2A07.f1   |            |             |                                                            | -1.23                    | -2.96           | 29.26 | 0.0060  |
| SB02009B1A07.f1.A | Gga.31032  | CHST1       | Carbohydrate sulfotransferase 1                            | -1.23                    | -2.98           | 29.26 | 0.0057  |
| SB03006B1B04.f1   |            |             |                                                            | -1.22                    | -3.08           | 29.26 | 0.0045  |
| SB03035B2H10.f1   | Gga.35012  | TUBA3D      | Tubulin alpha chain                                        | -1.22                    | -3.04           | 29.26 | 0.0050  |

|                     |           |           |                                                                   |       |       |       |        |
|---------------------|-----------|-----------|-------------------------------------------------------------------|-------|-------|-------|--------|
| SB02043A1E08.f1     | Gga.9682  | BCLAF1    | BCL2-associated transcription factor 1                            | -1.22 | -3.45 | 29.26 | 0.0017 |
| SB03017B2D12.f1     | Hs.239514 | DGKE      | Diacylglycerol kinase, epsilon                                    | -1.22 | -2.77 | 29.26 | 0.0097 |
| SB03028B2B12.f1     | Hs.493771 | C9orf25   | Chromosome 9 open reading frame 25                                | -1.21 | -3.02 | 29.26 | 0.0053 |
| SB02026A1C05.f1     | Gga.21932 | TH1L      | TH1L Hypothetical protein                                         | -1.21 | -2.79 | 29.26 | 0.0093 |
| SB03022B2B12.f1     | Gga.8053  | TIMM22    | Mitochondrial import inner membrane translocase subunit Tim22     | -1.21 | -3.06 | 29.26 | 0.0047 |
| SB03042A1E07.f1     | Gga.30051 | SGSM3     | Small G protein signaling modulator 3                             | -1.21 | -2.93 | 26.26 | 0.0069 |
| SB03018B2E05.f1     | Gga.30898 | PIK3R4    | Phosphoinositide-3-kinase, regulatory subunit 4, p150             | -1.21 | -2.93 | 29.26 | 0.0065 |
| SB02025A1A03.f1     | Gga.2749  | ZNF462    | Zinc finger protein 462                                           | -1.20 | -2.83 | 29.26 | 0.0083 |
| SB03001A2E08.f1     | Gga.2486  | RAB10     | RAB10, member RAS oncogene family                                 | -1.20 | -2.96 | 29.26 | 0.0060 |
| SB010002000G04      | Gga.4903  | RRN3      | TC190447 + GO                                                     | -1.20 | -2.94 | 29.26 | 0.0063 |
| SB02048A2C02.f1     | Gga.7650  | GSK3B     | Glycogen synthase kinase 3 beta                                   | -1.20 | -2.76 | 29.26 | 0.0099 |
| SB020001000D12      | Gga.37351 | RNF2      | Ring finger protein 2                                             | -1.20 | -3.08 | 29.26 | 0.0045 |
| SB02008B2H07.f1     | Gga.12604 | MS4A15    | Membrane-spanning 4-domains, subfamily A, member 15               | -1.20 | -2.88 | 29.26 | 0.0074 |
| SB02034B1F09.f1     | Gga.8044  | PRDX1     | Peroxiredoxin 1                                                   | -1.19 | -3.07 | 29.26 | 0.0046 |
| SB02025B2A10.f1     |           |           |                                                                   | -1.19 | -2.76 | 29.26 | 0.0100 |
| SB03018B1E09.f1     | Hs.517262 | SON       | SON DNA binding protein                                           | -1.19 | -2.83 | 29.26 | 0.0084 |
| SB010002000B12      | Gga.1342  | KIF5B     | kinesin family member 5B                                          | -1.19 | -2.83 | 29.26 | 0.0084 |
| SB03010B1G04.f1     |           |           |                                                                   | -1.19 | -2.84 | 29.26 | 0.0081 |
| SB03006B2H08.f1     | Gga.3148  | EXOC5     | Exocyst complex component Sec10                                   | -1.19 | -3.43 | 29.26 | 0.0018 |
| SB03016B2E11.f1     | Gga.23841 | GNB5      | Guanine nucleotide-binding protein beta subunit 5                 | -1.19 | -2.81 | 29.26 | 0.0088 |
| SB03035A2C01.f1     | Gga.1055  | HK2       | Hexokinase 2                                                      | -1.18 | -2.94 | 29.26 | 0.0063 |
| SB02041A1A03.f1     | Gga.22563 | KRR1      | KRR1, small subunit (SSU) processome component                    | -1.18 | -3.27 | 29.26 | 0.0027 |
| SB02011B1F04.f1     | Gga.31806 | TTC37     | MKIAA0372 protein                                                 | -1.18 | -3.06 | 28.26 | 0.0049 |
| SB03012B2G01.f1     | Gga.19307 | GRID2     | Glutamate receptor, ionotropic, delta 2                           | -1.18 | -2.80 | 29.26 | 0.0091 |
| SB03008A2F02.f1     | Gga.6358  | C9orf61   | Chromosome 9 open reading frame 61                                | -1.18 | -2.83 | 29.26 | 0.0084 |
| SB02048B1A09.f1     | Gga.38986 | TM9SF4    | Transmembrane 9 superfamily protein member 4                      | -1.17 | -3.09 | 29.26 | 0.0043 |
| SB03042B2G02.f1     | Gga.19420 | MIER1     | Mesoderm induction early response 1 homolog                       | -1.17 | -2.79 | 29.26 | 0.0092 |
| SB03007B1C06.f1     | Gga.4601  | LIN7C     | Lin-7-C, complete                                                 | -1.17 | -3.18 | 29.26 | 0.0035 |
| SB03022B2H04.f1     | Gga.3176  | RNF12     | RING finger protein 12 (LIM domain inter                          | -1.16 | -2.84 | 29.26 | 0.0082 |
| SB03008B2A01.f1.A   | Gga.25133 | ACRC      | Acidic repeat containing                                          | -1.16 | -2.92 | 29.26 | 0.0067 |
| SB010019000A02.A    | Gga.7325  | GABARAPL2 | Gamma-aminobutyric acid receptor-associated protein like 2        | -1.16 | -2.76 | 29.26 | 0.0100 |
| SB03028A2E03.f1     | Gga.9945  | RBM15B    | Putative RNA-binding protein 15B                                  | -1.16 | -2.86 | 29.26 | 0.0078 |
| SB03051B1F05.f1.B.M |           |           |                                                                   | -1.15 | -2.76 | 29.26 | 0.0098 |
| SB02022A2H03.f1     | Gga.41286 | EED       | Polycomb protein Esc                                              | 1.16  | 2.89  | 29.26 | 0.0072 |
| SB02022B2F07.f1.B   | Gga.17987 | JAKMIP2   | Janus kinase and microtubule interacting protein 2                | 1.16  | 3.05  | 29.26 | 0.0048 |
| SB03015A1A12.f1     | Gga.3116  | TRABD     | TraB domain containing                                            | 1.17  | 2.93  | 29.26 | 0.0064 |
| SB02003B1D04.f1.B   | Gga.2384  | ZFYVE1    | Zinc finger, FYVE domain containing 1                             | 1.17  | 3.15  | 29.26 | 0.0038 |
| SB03015A1D03.f1     | Gga.7025  | PSMG2     | Proteasome assembly chaperone 2                                   | 1.17  | 3.03  | 29.26 | 0.0051 |
| SB03037B2D10.f1     | Gga.4684  | TMEM35    | Splicing factor, proline- and glutamine-rich                      | 1.17  | 2.89  | 29.26 | 0.0072 |
| SB02041A1A11.f1.B.W | Gga.3243  | CSNK2A1   | Casein kinase 2, alpha 1 polypeptide                              | 1.18  | 2.79  | 29.26 | 0.0092 |
| SB03009B1B03.f1     | Gga.11342 | GAL3ST2   | Galactose-3-O-sulfotransferase 2                                  | 1.18  | 3.06  | 28.26 | 0.0048 |
| SB03006A1H08.f1     | Gga.17033 | ARHGEF6   | Rho guanine nucleotide exchange factor 6                          | 1.18  | 3.48  | 29.26 | 0.0016 |
| SB02027A2G05.f1     | Gga.28057 | GTF2F2    | Transcription initiation factor IIF beta subunit                  | 1.18  | 3.47  | 29.26 | 0.0016 |
| SB02012A2F10.f1.B   | Gga.5473  | CHCHD10   | Coiled-coil-helix-coiled-coil-helix doma                          | 1.19  | 3.13  | 29.26 | 0.0040 |
| SB02043A2G01.f1     | Gga.12366 | NUP37     | Nucleoporin Nup37                                                 | 1.19  | 2.79  | 29.26 | 0.0092 |
| SB02038B1A07.f1     | Gga.2904  | SNUPN     | Snurportin 1                                                      | 1.19  | 3.18  | 29.26 | 0.0035 |
| SB03001A1G05.f1     | Gga.8084  | TMEM126A  | Transmembrane protein 126A                                        | 1.20  | 3.80  | 29.26 | 0.0007 |
| SB02016B2D05.f1     |           |           |                                                                   | 1.20  | 3.29  | 29.26 | 0.0026 |
| SB02023B2G09.f1     | Gga.31156 | C10orf137 | Chromosome 16 open reading frame 73                               | 1.20  | 3.12  | 29.26 | 0.0041 |
| SB03030B1F09.f1     | Gga.34543 | CSNK1A1   | Casein kinase I, alpha isoform                                    | 1.20  | 3.16  | 29.26 | 0.0036 |
| SB02022A2D12.f1     | Gga.12569 | FBNP1L    | Formin binding protein 1-like                                     | 1.20  | 3.87  | 29.26 | 0.0006 |
| SB02049B1E09.f1     | Gga.18098 | LARP1     | La-related protein 1                                              | 1.20  | 2.82  | 29.26 | 0.0085 |
| SB010001001F11      | Gga.7860  | XPO6      | Exportin 6                                                        | 1.21  | 2.94  | 29.26 | 0.0064 |
| SB02022B2B04.f1     |           |           |                                                                   | 1.21  | 2.76  | 29.26 | 0.0098 |
| SB03005A2E08.f1     | Gga.39652 | DNAL1     | Dynein, axonemal, light intermediate chain 1                      | 1.21  | 2.87  | 29.26 | 0.0075 |
| SB02008A2F06.f1     | Gga.6296  | SAR1B     | GTP-binding protein SAR1b                                         | 1.21  | 2.96  | 29.26 | 0.0061 |
| SB02011B2D01.f1.B.W | Gga.27429 | ABI2      | Abl-interactor 2                                                  | 1.21  | 2.78  | 29.26 | 0.0094 |
| SB02025A2H03.f1.B.W | Gga.13432 | R3HDM1    | R3H domain protein 1                                              | 1.22  | 3.28  | 29.26 | 0.0027 |
| SB02031A2E05.f1     | Gga.9866  | RALB      | V-ral simian leukemia viral oncogene homolog B                    | 1.22  | 3.31  | 29.26 | 0.0025 |
| SB03032B2A10.f1.A   |           |           |                                                                   | 1.22  | 2.85  | 29.26 | 0.0079 |
| SB03029A1A12.f1     | Gga.42914 | HS3ST6    | Heparan sulfate glucosamine 3-O-sulfotransferase 6                | 1.23  | 3.12  | 29.26 | 0.0040 |
| SB02012A1E02.f1     | Hs.375837 | C10orf93  | Putative uncharacterized protein C10orf93                         | 1.23  | 2.87  | 29.26 | 0.0076 |
| SB02005A2F01.f1.B   | Gga.26588 | DLG3      | Disks large homolog 3                                             | 1.23  | 2.87  | 29.26 | 0.0076 |
| SB010018000H11      | Gga.883   | RFC2      | Activator 1 40 kDa subunit                                        | 1.23  | 3.26  | 29.26 | 0.0028 |
| SB03046A1B11.f1     | Gga.208   | WNT7A     | Wingless-type MMTV integration site family, member 7A             | 1.23  | 2.84  | 29.26 | 0.0081 |
| SB02028B2C12.f1     | Gga.9706  | CHMP2B    | Charged multivesicular body protein 2b                            | 1.23  | 3.84  | 29.26 | 0.0006 |
| SB03045A1D10.f1     | Gga.21092 | PHF20L1   | PHD finger protein 20-like 1                                      | 1.23  | 3.20  | 29.26 | 0.0033 |
| SB03039A1D05.f1     | Hs.185489 | LYRM1     | LYR motif-containing protein 1                                    | 1.23  | 2.90  | 29.26 | 0.0070 |
| SB02049A1H06.f1.B   | Gga.40030 | ZFYVE9    | Zinc finger FYVE domain-containing protein 9                      | 1.24  | 3.36  | 29.26 | 0.0022 |
| SB02040B2D04.f1     | Gga.37954 | CHKA      | Choline kinase alpha                                              | 1.24  | 3.62  | 29.26 | 0.0011 |
| SB03023A2B06.f1     | Gga.1184  | PSMB4     | Proteasome subunit beta type 4 precursor                          | 1.24  | 3.88  | 29.26 | 0.0005 |
| SB03042A2C12.f1     | Hs.445574 | C17orf96  | Chromosome 17 open reading frame 96                               | 1.24  | 2.81  | 28.26 | 0.0089 |
| SB03028B1D02.f1     | Gga.42380 | AMFR      | Autocrine motility factor receptor                                | 1.24  | 3.43  | 29.26 | 0.0018 |
| SB03007B2H01.f1     | Hs.551747 | NEU4      | Sialidase 4                                                       | 1.24  | 2.85  | 29.26 | 0.0080 |
| SB02040B2C06.f1     | Gga.7158  | CD164     | Probable aspartate aminotransferase                               | 1.24  | 2.89  | 29.26 | 0.0072 |
| SB03024B2A05.f1     | Gga.9061  | RTCD1     | RNA 3'-terminal phosphate cyclase                                 | 1.24  | 2.99  | 29.26 | 0.0056 |
| SB02027A2B12.f1     | Gga.2833  | SNF1LK    | Qin-induced kinase, complete                                      | 1.24  | 3.02  | 29.26 | 0.0052 |
| SB02027A2B05.f1     | Gga.15424 | WDSOF1    | WD repeats and SOF1 domain containing                             | 1.24  | 3.04  | 29.26 | 0.0050 |
| SB02009B1E10.f1     | Gga.12452 | ITGB1BP1  | Integrin beta-1 binding protein 1                                 | 1.24  | 2.85  | 29.26 | 0.0079 |
| SB03003A2A10.f1     | Gga.30817 | RNF144A   | C3HC4 zinc-finger in the C-termina                                | 1.24  | 2.99  | 29.26 | 0.0057 |
| SB02032B1H06.f2.B   | Gga.7793  | ADAM17    | ADAM metallopeptidase domain 17                                   | 1.25  | 2.81  | 29.26 | 0.0088 |
| SB02037A2H12.f1     | Gga.2751  | UQCRCQ    | Ubiquinol-cytochrome c reductase complex                          | 1.25  | 3.20  | 29.26 | 0.0033 |
| SB010014000H04      | Gga.3831  | PACSN2    | Protein kinase C and casein kinase substrate in neurons protein 2 | 1.25  | 3.17  | 29.26 | 0.0036 |
| SB02043B1A05.f1     | Gga.17148 | UBE3A     | Ubiquitin protein ligase E3A                                      | 1.25  | 2.92  | 29.26 | 0.0067 |

|                     |           |          |                                                                          |      |      |       |        |
|---------------------|-----------|----------|--------------------------------------------------------------------------|------|------|-------|--------|
| SB02014B1A04.f1     | Gga.768   | TGIF1    | Homeobox protein AKR                                                     | 1.25 | 3.08 | 29.26 | 0.0045 |
| SB03005B2A03.f1     | Gga.8061  | HSCB     | Similar to J-type co-chaperone HSC20                                     | 1.25 | 3.01 | 29.26 | 0.0053 |
| SB03040A2C10.f1.B   | Gga.537   | VEGFA    | Vascular endothelial growth factor A Precursor                           | 1.25 | 3.81 | 29.26 | 0.0007 |
| SB02022A1G04.f1     |           |          |                                                                          | 1.25 | 2.91 | 29.26 | 0.0068 |
| SB03043A1C12.f1.B   | Gga.24614 | TSPAN10  | Tetraspanin 10                                                           | 1.25 | 3.10 | 29.26 | 0.0042 |
| SB02005A2F09.f1.B   |           |          |                                                                          | 1.26 | 3.03 | 29.26 | 0.0051 |
| SB02042A2C07.f1     | Gga.9785  | NMT2     | N-myristoyltransferase 2                                                 | 1.26 | 3.71 | 29.26 | 0.0009 |
| SB03027B2F02.f1     | Gga.34340 | NRN1     | Neuritin 1                                                               | 1.26 | 3.12 | 29.26 | 0.0040 |
| SB03003B2B03.f1     | Gga.8480  | HMBS     | Porphobilinogen deaminase                                                | 1.26 | 3.34 | 29.26 | 0.0023 |
| SB03043A1B03.f1     | Gga.2718  | NUDT14   | Nudix (nucleoside diphosphate linked moiety X)-type motif 14             | 1.26 | 2.96 | 29.26 | 0.0061 |
| SB010009001H01      | Gga.3222  | LIMK2    | LIM domain kinase 2                                                      | 1.26 | 3.37 | 29.26 | 0.0021 |
| SB03047B2H12.f1     | Gga.3406  | FOXO1    | Forkhead protein FKHR                                                    | 1.26 | 2.79 | 29.26 | 0.0091 |
| SB02003A1B05.f2     | Hs.387856 | TTC28    | Tetratricopeptide repeat domain 28                                       | 1.27 | 2.81 | 29.26 | 0.0089 |
| SB02031A1E06.f1     | Gga.8788  | SLC25A29 | Solute carrier family 25, member 29                                      | 1.27 | 3.44 | 29.26 | 0.0018 |
| SB02009A1F10.f1     | Gga.12450 | GATAD1   | Ocular development-associated gene                                       | 1.27 | 3.22 | 29.26 | 0.0031 |
| SB02014B1E05.f1     | Gga.8084  | TMEM126A | Transmembrane protein 126A                                               | 1.27 | 3.56 | 29.26 | 0.0013 |
| SB02014A1B06.f2     | Gga.31705 | GLCC11   | Glucocorticoid induced transcript 1                                      | 1.27 | 3.59 | 29.26 | 0.0012 |
| SB010021000C09      | Hs.709353 | CACNB2   | Calcium channel, voltage-dependent, beta 2 subunit                       | 1.27 | 2.79 | 29.26 | 0.0092 |
| SB02012A2G08.f1     | Gga.20086 | ACAT2    | Acetyl-CoA acetyltransferase                                             | 1.27 | 3.07 | 29.26 | 0.0046 |
| SB02042A2F04.f1.A   | Gga.3071  | SELS     | Selenoprotein S                                                          | 1.27 | 2.83 | 29.26 | 0.0083 |
| SB03046B1A10.f1     |           |          |                                                                          | 1.28 | 2.76 | 29.26 | 0.0099 |
| SB02004B1H07.f1     | Gga.21366 | HSPH1    | Heat-shock protein 105 kDa                                               | 1.28 | 3.55 | 29.26 | 0.0013 |
| SB010004001B01      | Gga.9053  | XBP1     | X-box binding protein 1                                                  | 1.28 | 3.09 | 29.26 | 0.0044 |
| SB010015000F04      | Gga.12237 | STX18    | Syntaxin-18                                                              | 1.28 | 2.91 | 29.26 | 0.0068 |
| SB02014A2B07.f2     | Gga.5690  | RBM24    | RNA-binding region                                                       | 1.28 | 2.83 | 28.26 | 0.0085 |
| SB02003B1G07.f1     | Gga.9995  | CROT     | similar to carnitine octanoyltransferase                                 | 1.28 | 2.85 | 29.26 | 0.0080 |
| SB010004001E05      | Gga.5754  | SUZ12    | Suppressor of zeste 12 homolog                                           | 1.28 | 3.07 | 29.26 | 0.0045 |
| SB02004A2D01.f1.B   | Gga.3562  | MRPL12   | 39S ribosomal protein L12, mitochondrial                                 | 1.29 | 3.63 | 29.26 | 0.0011 |
| SB02015B1F07.f1     | Gga.27627 | TIAM2    | Sif and Tiam1-like exchange factor                                       | 1.29 | 2.86 | 29.26 | 0.0077 |
| SB02049A1A02.f1     | Gga.8606  | PGK2     | Phosphoglycerate kinase                                                  | 1.29 | 3.05 | 29.26 | 0.0048 |
| SB010010000H04      | Gga.41559 | LRRC38   | Leucine rich repeat containing 38                                        | 1.29 | 2.94 | 29.26 | 0.0064 |
| SB03041B1A02.f1.B   | Gga.10026 | VPS37B   | hypothetical protein FLJ12750                                            | 1.30 | 3.39 | 29.26 | 0.0020 |
| SB03048B1D04.f1     | Gga.22064 | THAP5    | THAP domain containing 5                                                 | 1.30 | 3.01 | 29.26 | 0.0053 |
| SB03020A2D11.f1     | Gga.10624 | ZBTB41   | Zinc finger protein 226                                                  | 1.30 | 3.04 | 29.26 | 0.0050 |
| SB03021A1D05.f1     | Gga.39100 | LRWD1    | Leucine-rich repeats and WD repeat domain containing 1                   | 1.30 | 2.79 | 29.26 | 0.0092 |
| SB03015B1E05.f1     |           |          |                                                                          | 1.30 | 3.77 | 29.26 | 0.0007 |
| SB02009B2G05.f1.B   | Gga.22402 | COMM10   | COMM domain containing protein 10                                        | 1.30 | 3.67 | 29.26 | 0.0010 |
| SB03041B2G04.f1     | Gga.28695 | AGTPBP1  | ATP/GTP binding protein 1                                                | 1.31 | 2.86 | 29.26 | 0.0078 |
| SB03009A1D07.f1     |           |          |                                                                          | 1.31 | 3.02 | 29.26 | 0.0052 |
| SB03024B2F12.f1     | Gga.3323  | FABP5    | Fatty acid binding protein 5                                             | 1.31 | 3.04 | 29.26 | 0.0049 |
| SB03031A2G05.f1     | Gga.15373 | DDX31    | Probable ATP-dependent RNA helicase DDX31                                | 1.31 | 3.20 | 29.26 | 0.0033 |
| SB02017B1G09.f1     |           |          |                                                                          | 1.31 | 2.83 | 29.26 | 0.0084 |
| SB02027A1H01.f1     | Gga.2736  | ORC2L    | Origin recognition complex, subunit 2-like                               | 1.32 | 2.80 | 29.26 | 0.0091 |
| SB03026B1H09.f1     | Gga.150   | FLT1     | Fms-related tyrosine kinase 1                                            | 1.32 | 3.39 | 29.26 | 0.0020 |
| SB02017B1H06.f1     | Gga.12894 | DNAJB4   | DnaJ (Hsp40) homolog, subfamily B, member 4                              | 1.32 | 2.78 | 29.26 | 0.0093 |
| SB02029A1B08.f1     | Gga.40185 | NOD1     | Nucleotide-binding oligomerization domain containing 1                   | 1.32 | 3.25 | 29.26 | 0.0029 |
| SB02011A2E09.f1     | Gga.3680  | SEPT2    | Septin 2 (NEDD5 protein homolog)                                         | 1.32 | 3.22 | 29.26 | 0.0032 |
| SB02019B2D05.f1     | Gga.30082 | TAF5L    | TAF5-like RNA polymerase II p300/CBP-associated factor 65 kDa subunit 5L | 1.32 | 3.05 | 29.26 | 0.0049 |
| SB02015A1G08.f1     | Gga.4766  | POLR2D   | DNA-directed RNA polymerase II 16 kDa                                    | 1.33 | 3.18 | 29.26 | 0.0035 |
| SB02023A1D07.f1     | Gga.5884  | DYNLL1   | Dynein, cytoplasmic, light chain 1                                       | 1.33 | 3.24 | 29.26 | 0.0030 |
| SB02042A1A07.f1     |           |          |                                                                          | 1.33 | 3.52 | 29.26 | 0.0015 |
| SB010015000A11      |           |          |                                                                          | 1.33 | 3.08 | 29.26 | 0.0044 |
| SB03023B2G08.f1     |           |          |                                                                          | 1.33 | 2.77 | 29.26 | 0.0096 |
| SB02019A2D07.f1     | Gga.40345 | ENTPD3   | Ectonucleoside triphosphate diphosphohydrolase 3                         | 1.33 | 2.80 | 29.26 | 0.0090 |
| SB02017B1D07.f1     |           |          |                                                                          | 1.34 | 2.90 | 29.26 | 0.0071 |
| SB03010B1F10.f1     | Gga.3178  | DACH2    | Dachshund homolog 2                                                      | 1.34 | 2.93 | 29.26 | 0.0065 |
| SB02013A2A11.f1     | Gga.36586 | ADCK2    | AarF domain containing kinase 2, partial                                 | 1.34 | 2.82 | 29.26 | 0.0085 |
| SB02034A2H05.f1     | Gga.40378 | PITPNC1  | Phosphatidylinositol transfer protein, cytoplasmic 1                     | 1.35 | 3.07 | 29.26 | 0.0046 |
| SB02010B1D10.f1     | Gga.30233 | RPS6KA2  | Ribosomal protein S6 kinase, polypeptide 2                               | 1.37 | 3.95 | 29.26 | 0.0005 |
| SB02033B2G04.f1     | Gga.28057 | GTF2F2   | General transcription factor IIF, polypeptide 2, 30kDa                   | 1.37 | 3.95 | 29.26 | 0.0005 |
| SB03027A1C08.f1.M   | Gga.14002 | DENND4C  | DENN/MADD domain containing 4C                                           | 1.37 | 3.22 | 29.26 | 0.0031 |
| SB03003A1F12.f1     | Gga.44589 | ITGA6    | Integrin, alpha 6                                                        | 1.39 | 3.67 | 29.26 | 0.0010 |
| SB03030B2B09.f1     | Gga.23837 | FBXL2    | F-box/LRR-repeat protein 2                                               | 1.39 | 2.97 | 29.26 | 0.0059 |
| SB03044B1B10.f1     | Gga.5900  | DNAJA1   | similar to pDJA1 chaperone                                               | 1.40 | 5.09 | 29.26 | 0.0000 |
| SB03049A2F11.f1     | Gga.16800 | MAPRE1   | Microtubule-associated protein RP/EB family member 1                     | 1.41 | 4.01 | 29.26 | 0.0004 |
| SB03048A2G09.f1     |           |          |                                                                          | 1.41 | 3.45 | 29.26 | 0.0017 |
| SB03002B2H04.f1     |           |          |                                                                          | 1.42 | 2.98 | 29.26 | 0.0058 |
| SB02031A2C06.f1     |           |          |                                                                          | 1.42 | 3.96 | 29.26 | 0.0004 |
| SB02046B2E09.f1     | Hs.308710 | JHDM1D   | Jumonji C domain-containing histone demethylase 1 homolog D              | 1.42 | 2.94 | 29.26 | 0.0064 |
| SB02020B1G02.f1     | Gga.12894 | DNAJB4   | DnaJ (Hsp40) homolog, subfamily B, member 4                              | 1.43 | 3.72 | 29.26 | 0.0008 |
| SB02038A1C02.f1     | Gga.11181 | BACH2    | BTB and CNC homology 1, basic leucine zipper transcription factor 2      | 1.44 | 3.44 | 29.26 | 0.0018 |
| SB03019A1H01.f1     | Gga.19165 | VRK2     | Serine/threonine-protein kinase VRK2                                     | 1.45 | 3.17 | 29.26 | 0.0035 |
| SB03022A2C01.f1     | Gga.9158  | AHSA2    | Activator of heat shock 90kDa protein ATPase homolog 2                   | 1.45 | 5.15 | 29.26 | 0.0000 |
| SB02038B1F08.f1     | Gga.28057 | GTF2F2   | General transcription factor IIF, polypeptide 2, 30kDa                   | 1.46 | 3.08 | 29.26 | 0.0045 |
| SB03024B1A12.f1     | Gga.32314 | SLC38A4  | Solute carrier family 38, member 4                                       | 1.48 | 3.04 | 29.26 | 0.0049 |
| SB03033A2C05.f1     | Gga.30133 | NR4A3    | Orphan nuclear receptor NR4A3                                            | 1.49 | 3.33 | 29.26 | 0.0024 |
| SB02029A1F03.f1     |           |          |                                                                          | 1.50 | 2.79 | 29.26 | 0.0091 |
| SB02025A1C03.f1     | Gga.5799  | P4HA2    | Prolyl 4-hydroxylase alpha-2 subunit precursor                           | 1.56 | 2.95 | 29.26 | 0.0062 |
| SB02034A1F12.f1.B.W | Gga.38109 | MGST1    | Microsomal glutathione S-transferase 1                                   | 1.56 | 2.95 | 29.26 | 0.0062 |
| SB03044A2D03.f1     | Hs.719230 | HSPA2    | Heat shock 70 kDa protein 2                                              | 1.57 | 3.38 | 29.26 | 0.0021 |
| SB03009B2H04.f1     | Gga.5799  | P4HA2    | Prolyl 4-hydroxylase alpha-2 subunit precursor                           | 1.69 | 4.31 | 29.26 | 0.0002 |
| SB03046A2H10.f1     | Hs.719374 | OPA3     | Optic atrophy 3 protein                                                  | 1.73 | 4.69 | 29.26 | 0.0001 |
| SB03037B2H05.f1     | Hs.719230 | HSPA2    | Heat shock 70 kDa protein 2                                              | 1.76 | 4.68 | 29.26 | 0.0001 |
| SB03032B2H11.f1     |           |          |                                                                          | 1.76 | 3.11 | 29.26 | 0.0042 |

|                   |           |          |                                              |       |      |       |        |
|-------------------|-----------|----------|----------------------------------------------|-------|------|-------|--------|
| SB02032A2C07.f2   | Gga.30876 | DMAP1    | DNA methyltransferase 1 associated protein 1 | 1.94  | 2.87 | 29.26 | 0.0075 |
| SB02021A2E01.f1   | Gga.405   | ITPKA    | Inositol 1,4,5-trisphosphate 3-kinase A      | 2.07  | 3.69 | 29.26 | 0.0009 |
| SB010015000G04    |           |          |                                              | 2.34  | 3.43 | 29.26 | 0.0018 |
| SB02004A2D02.f1   | Gga.27948 | C10orf56 | chromosome 10 open reading frame 56          | 3.41  | 2.88 | 29.26 | 0.0073 |
| SB02003A1C05.f2.B | Gga.11856 | NRSN1    | Neurensin 1                                  | 4.21  | 2.91 | 29.26 | 0.0069 |
| SB02032A1H02.f2.B | Gga.28740 | C17orf56 | Chromosome 17 open reading frame 56          | 5.17  | 2.82 | 28.26 | 0.0088 |
| SB02043A2F01.f1.B | Gga.16557 | ARL5A    | ADP-ribosylation factor-like protein 5       | 6.80  | 3.03 | 28.26 | 0.0052 |
| SB03038B1F04.f1   | Gga.2620  | TTR      | Transthyretin precursor                      | 8.34  | 3.00 | 29.26 | 0.0055 |
| SB03035A2H04.f1.B | Gga.41728 | LBXCOR1  | Ladybird homeobox corepressor 1              | 8.50  | 3.07 | 29.26 | 0.0046 |
| SB02032B2F01.f2   | Gga.2620  | TTR      | Transthyretin precursor                      | 9.84  | 3.12 | 29.26 | 0.0040 |
| SB02026B2H07.f1   | Gga.2620  | TTR      | Transthyretin precursor                      | 9.97  | 3.07 | 29.26 | 0.0045 |
| SB02015A2G08.f1   | Gga.2620  | TTR      | Transthyretin precursor                      | 13.34 | 3.33 | 29.26 | 0.0024 |
