# Supplementary material for: Seasonal Differences of Gene Expression Profiles in Song Sparrow (Melospiza melodia) Hypothalamus in Relation to Territorial Aggression
Source: PubMed Central journal article supplement (PMC2780717; doi:10.1371/journal.pone.0008182), 2009-12-04
Supplement: pone.0008182.s002.pdf [file pone.0008182.s002.pdf]

| Spot ID           | UniGene ID | HGNC_symbol | Gene Description                                                       | Fold Change T |           | df    | P-value |
|-------------------|------------|-------------|------------------------------------------------------------------------|---------------|-----------|-------|---------|
|                   |            |             |                                                                        | AE vs. SE     | Statistic |       |         |
| SB02006A2H05.f1   | Gga.28520  | CGA         | Glycoprotein hormones alpha chain precursor                            | -7.43         | -7.67     | 29.26 | 0.0000  |
| SB03032A2G07.f1   | Gga.1079   | CRYM        | Mu-crystallin homolog                                                  | -2.40         | -3.84     | 29.26 | 0.0006  |
| SB03047B2E11.f1   | Gga.1079   | CRYM        | Mu-crystallin homolog                                                  | -2.31         | -3.94     | 29.26 | 0.0005  |
| SB02022A2D01.f1   | Gga.11726  | GADD45B     | Growth arrest and DNA-damage-inducible, beta                           | -2.26         | -5.70     | 29.26 | 0.0000  |
| SB03046A2G09.f1   |            |             |                                                                        | -2.21         | -3.26     | 29.26 | 0.0028  |
| SB03046B1C04.f1   | Gga.1079   | CRYM        | Mu-crystallin homolog                                                  | -2.05         | -3.59     | 29.26 | 0.0012  |
| SB03028B1F05.f1   |            |             |                                                                        | -1.98         | -2.79     | 29.26 | 0.0091  |
| SB02005B2G07.f1   |            |             |                                                                        | -1.91         | -2.79     | 29.26 | 0.0092  |
| SB02011A1B09.f1   | Gga.11430  | PENK        | Proenkephalin A Precursor                                              | -1.70         | -3.20     | 29.26 | 0.0033  |
| SB020001000D07    | Gga.11430  | PENK        | Proenkephalin A Precursor                                              | -1.65         | -3.55     | 29.26 | 0.0013  |
| SB02025A2E07.f1   |            |             |                                                                        | -1.64         | -2.81     | 29.26 | 0.0087  |
| SB010006000E12    |            |             |                                                                        | -1.63         | -4.07     | 29.26 | 0.0003  |
| SB02007A1D12.f1   | Gga.38496  | SMTNL1      | Smoothenin-like protein 1                                              | -1.63         | -5.02     | 29.26 | 0.0000  |
| SB03030B2C09.f1   | Gga.28278  | C5orf40     | chromosome 5 open reading frame 40                                     | -1.62         | -2.92     | 29.26 | 0.0067  |
| SB03046A2A02.f1   | Gga.21371  | NIT2        | Nitrilase homolog 2                                                    | -1.60         | -3.21     | 29.26 | 0.0032  |
| SB010015000A05    | Gga.28278  | C5orf40     | chromosome 5 open reading frame 40                                     | -1.60         | -3.12     | 29.26 | 0.0040  |
| SB03042B1B07.f1   | Gga.39788  | GREB1       | similar to growth regulation by estrogen in breast cancer protein      | -1.57         | -4.37     | 28.26 | 0.0002  |
| SB03034B2D05.f1   | Gga.17584  | ZBTB16      | Zinc finger and BTB domain-containing protein 16                       | -1.55         | -3.55     | 29.26 | 0.0013  |
| SB02023B2D11.f1   | Gga.4974   | VCAN        | Versican core protein Precursor                                        | -1.54         | -3.91     | 29.26 | 0.0005  |
| SB03006A1B07.f1   | Gga.944    | CENPH       | Centromere protein H                                                   | -1.54         | -3.03     | 29.26 | 0.0051  |
| SB010013001H09    | Gga.3168   | QKI         | Protein quaking (Hqkl)                                                 | -1.52         | -4.16     | 29.26 | 0.0003  |
| SB010020000D02.B  | Gga.14972  | LRRC3B      | Leucine-rich repeat-containing protein 3B Precursor                    | -1.51         | -3.25     | 29.26 | 0.0029  |
| SB02027A2C02.f1   | Gga.40320  | GLP2R       | Glucagon-like peptide 2 receptor Precursor                             | -1.49         | -3.09     | 29.26 | 0.0043  |
| SB03021A1B12.f1   | Gga.21228  | ABCG1       | ATP-binding cassette sub-family G member 1                             | -1.48         | -4.66     | 29.26 | 0.0001  |
| SB03033A1H12.f1   |            |             |                                                                        | -1.47         | -3.26     | 29.26 | 0.0028  |
| SB03048A2E10.f1   | Gga.31071  | CEP78       | Centrosomal protein of 78 kDa                                          | -1.46         | -3.91     | 29.26 | 0.0005  |
| SB02037B1A04.f1   | Gga.25837  | ADAMTS19    | ADAM metalloproteinase with thrombospondin type 1 motif, 19            | -1.46         | -4.42     | 29.26 | 0.0001  |
| SB03050A1E08.f1   | Gga.3370   | OCIAD2      | OCIA domain-containing protein 2                                       | -1.45         | -3.17     | 29.26 | 0.0036  |
| SB03043A1F02.f1   | Gga.102    | ABCA1       | ATP-binding cassette sub-family A member 1                             | -1.45         | -4.08     | 29.26 | 0.0003  |
| SB02009A2E02.f1   | Gga.2764   | SLC35F1     | Solute carrier family 35 member F1                                     | -1.44         | -2.92     | 29.26 | 0.0068  |
| SB03036B1C02.f1   | Gga.17584  | ZBTB16      | Zinc finger and BTB domain-containing protein 16                       | -1.42         | -3.82     | 29.26 | 0.0006  |
| SB03043B1E08.f1   | Gga.2937   | NFKBIA      | NF-kappa-B inhibitor alpha                                             | -1.42         | -3.10     | 29.26 | 0.0043  |
| SB02034B1H05.f1   | Gga.15742  | LARP4       | La-related protein 4                                                   | -1.41         | -3.43     | 28.26 | 0.0019  |
| SB03005A2H09.f1   | Gga.20550  | ABCA1       | ATP-binding cassette sub-family A member 1                             | -1.40         | -3.39     | 29.26 | 0.0020  |
| SB02035A1G11.f1   | Gga.9908   | MRPL50      | 39S ribosomal protein L50, mitochondrial                               | -1.39         | -2.94     | 29.26 | 0.0064  |
| SB03041A2C02.f1   | Gga.5899   | FAM125B     | Protein FAM125B                                                        | -1.38         | -3.09     | 29.26 | 0.0044  |
| SB02011B1D08.f1   | Gga.1210   | CCRN4L      | carbon catabolite repression 4-like                                    | -1.37         | -3.79     | 29.26 | 0.0007  |
| SB010022000E01    |            |             |                                                                        | -1.37         | -3.17     | 29.26 | 0.0036  |
| SB03002B1B06.f1   | Gga.7347   | MCAT        | Malonyl CoA-acyl carrier protein transacylase, mitochondrial Precursor | -1.37         | -2.99     | 29.26 | 0.0056  |
| SB03042A2C10.f1   | Gga.4941   | CDH11       | Cadherin-11 Precursor                                                  | -1.37         | -2.95     | 29.26 | 0.0063  |
| SB03034B2G06.f1   | Gga.12295  | PPAP3       | Lipid phosphate phosphatase-related protein type 1                     | -1.37         | -2.82     | 29.26 | 0.0086  |
| SB02020A2B09.f1   | Gga.7482   | SETD4       | SET domain-containing protein 4                                        | -1.36         | -2.92     | 29.26 | 0.0067  |
| SB010010000G09    | Gga.10902  | RASL11A     | Ras-like protein family member 11A                                     | -1.36         | -2.80     | 29.26 | 0.0090  |
| SB03007B1E09.f1   | Gga.20327  | KLF13       | Krueppel-like factor 13                                                | -1.36         | -3.15     | 29.26 | 0.0038  |
| SB03028A2E06.f1   | Gga.29845  | RBM15       | Putative RNA-binding protein 15                                        | -1.35         | -5.48     | 29.26 | 0.0000  |
| SB02031B2F04.f1   |            |             |                                                                        | -1.34         | -3.41     | 29.26 | 0.0019  |
| SB02033B1G10.f1   | Gga.9668   | ATRX        | Transcriptional regulator ATRX                                         | -1.34         | -3.10     | 28.26 | 0.0044  |
| SB03035A1E08.f1   | Gga.25176  | TTC19       | Tetratricopeptide repeat protein 19                                    | -1.32         | -4.16     | 29.26 | 0.0003  |
| SB02009B2F04.f1   | Gga.5775   | HNRNPA3     | Heterogeneous nuclear ribonucleoprotein A3 (hnRNP A3)                  | -1.32         | -6.22     | 29.26 | 0.0000  |
| SB03008A2B06.f1   | Gga.6508   | GLRA2       | Glycine receptor subunit alpha-2 Precursor                             | -1.32         | -3.11     | 29.26 | 0.0041  |
| SB02031A1F10.f1   | Gga.31071  | CEP78       | Centrosomal protein of 78 kDa                                          | -1.32         | -3.03     | 29.26 | 0.0051  |
| SB03011B1B10.f1   | Gga.9774   | RBM9        | RNA-binding motif protein 9                                            | -1.32         | -2.95     | 29.26 | 0.0062  |
| SB02049B1H01.f1   | Gga.41617  | NTF3        | Neurotrophin-3 Precursor                                               | -1.32         | -3.45     | 29.26 | 0.0017  |
| SB010009001B06    | Gga.30217  | ESCO1       | N-acetyltransferase ESCO1                                              | -1.31         | -3.57     | 29.26 | 0.0013  |
| SB03004A2B07.f1   |            |             |                                                                        | -1.31         | -2.96     | 29.26 | 0.0060  |
| SB02043B1F05.f1   |            |             |                                                                        | -1.31         | -3.20     | 29.26 | 0.0033  |
| SB02027B2B09.f1   |            |             |                                                                        | -1.31         | -2.97     | 29.26 | 0.0059  |
| SB02016A2C01.f1   | Gga.10504  | CASKIN2     | Caskin-2                                                               | -1.30         | -3.14     | 28.26 | 0.0040  |
| SB02040A2H01.f1   | Gga.39911  | ZGPAT       | Zinc finger CCCH-type with G patch domain-containing protein           | -1.30         | -3.04     | 29.26 | 0.0049  |
| SB03045A2D08.f1   |            |             |                                                                        | -1.30         | -3.69     | 29.26 | 0.0009  |
| SB03025B1E03.f2   | Gga.5829   | PSME4       | Proteasome activator complex subunit 4                                 | -1.30         | -3.21     | 29.26 | 0.0032  |
| SB010003000B02.B  |            |             |                                                                        | -1.30         | -3.01     | 29.26 | 0.0054  |
| SB03038B2F09.f1   | Gga.3091   | SCN5A       | Sodium channel protein type 5 subunit alpha                            | -1.29         | -2.92     | 29.26 | 0.0067  |
| SB03009B1B05.f1   | Gga.31229  | SCN1A       | Sodium channel protein type 1 subunit alpha                            | -1.29         | -3.08     | 29.26 | 0.0045  |
| SB03042A2H10.f1   | Gga.12278  | ADAT2       | tRNA-specific adenosine deaminase 2                                    | -1.29         | -2.79     | 29.26 | 0.0092  |
| SB03009B1B02.f1   | Gga.22426  | KIAA1370    | Uncharacterized protein KIAA1370                                       | -1.29         | -3.42     | 29.26 | 0.0019  |
| SB03019A2H03.f1   |            |             |                                                                        | -1.29         | -3.00     | 29.26 | 0.0054  |
| SB03009A2A03.f1   | Gga.10477  | TNFRSF19    | Tumor necrosis factor receptor superfamily member 19 Precursor         | -1.28         | -2.82     | 29.26 | 0.0085  |
| SB03008A1D08.f1   | Gga.10043  | PICK1       | Protein interacting with C kinase 1                                    | -1.28         | -3.52     | 29.26 | 0.0014  |
| SB010024000A05    |            |             |                                                                        | -1.28         | -3.23     | 29.26 | 0.0031  |
| SB03015A2A11.f1.A |            |             |                                                                        | -1.28         | -2.80     | 29.26 | 0.0091  |
| SB03020A1C12.f1   | Hs.651939  | MAG1        | Membrane associated guanylate kinase, WW and PDZ domain containing 1   | -1.28         | -2.84     | 29.26 | 0.0080  |
| SB02020A2B05.f1.B |            |             |                                                                        | -1.28         | -3.23     | 29.26 | 0.0031  |
| SB03049B1H03.f1   | Gga.19496  | C1orf114    | Uncharacterized protein C1orf114                                       | -1.27         | -2.83     | 29.26 | 0.0083  |
| SB03041B2E04.f1   | Gga.36295  | C16orf45    | Uncharacterized protein C16orf45                                       | -1.27         | -3.10     | 29.26 | 0.0043  |
| SB03008B2C03.f1   |            |             |                                                                        | -1.27         | -3.52     | 29.26 | 0.0014  |
| SB02010A2C05.f1   | Gga.8061   | HSCB        | Co-chaperone protein HscB, mitochondrial Precursor                     | -1.26         | -3.47     | 29.26 | 0.0016  |
| SB02008B2H04.f1   | Gga.27391  | C9orf6      | chromosome 9 open reading frame 6                                      | -1.26         | -3.35     | 29.26 | 0.0022  |
| SB03039B1G07.f1   | Gga.43357  | RAC3        | Ras-related C3 botulinum toxin substrate 3 Precursor                   | -1.26         | -2.77     | 29.26 | 0.0096  |
| SB03003B2D06.f1   | Gga.19997  | CITED2      | Cbp/p300-interacting transactivator 2                                  | -1.26         | -3.38     | 29.26 | 0.0021  |
| SB03046A2C01.f1   | Gga.13455  | DYRK2       | Dual specificity tyrosine-phosphorylation-regulated kinase 2           | -1.25         | -2.97     | 29.26 | 0.0059  |
| SB02036B1C11.f1   | Gga.34693  | PION        | Protein pigeon homolog                                                 | -1.25         | -2.85     | 29.26 | 0.0079  |
| SB02029B1D08.f1   | Hs.348262  | KLHL13      | Kelch-like protein 13 (BTB and kelch domain-containing protein 2)      | -1.25         | -3.79     | 29.26 | 0.0007  |
| SB02030A2A11.f1   | Gga.26601  | AP1S2       | AP-1 complex subunit sigma-2                                           | -1.25         | -2.89     | 29.26 | 0.0072  |
| SB02016B1C07.f1   | Gga.9325   | UBE2T       | Ubiquitin-conjugating enzyme E2 T                                      | -1.25         | -3.61     | 29.26 | 0.0011  |
| SB010004001E12.B  |            |             |                                                                        | -1.25         | -2.77     | 29.26 | 0.0097  |

|                     |           |            |                                                                           |       |       |       |        |
|---------------------|-----------|------------|---------------------------------------------------------------------------|-------|-------|-------|--------|
| SB02014A1D08.f2     |           |            |                                                                           | -1.25 | -3.24 | 29.26 | 0.0030 |
| SB03002B1A11.f1     | Gga.29908 | ST3GAL5    | Lactosylceramide alpha-2,3-sialyltransferase                              | -1.25 | -2.97 | 29.26 | 0.0059 |
| SB02034A1D09.f1     | Gga.2646  | SLC33A1    | Acetyl-coenzyme A transporter 1 (Solute carrier family 33 member 1)       | -1.25 | -3.15 | 29.26 | 0.0037 |
| SB03044B1H02.f1     | Gga.14699 | SH3D19     | SH3 domain-containing protein 19                                          | -1.25 | -2.78 | 29.26 | 0.0094 |
| SB03033B1H08.f1     | Gga.28477 | PAPD5      | PAP associated domain containing 5 isoform a                              | -1.25 | -3.51 | 29.26 | 0.0015 |
| SB03002A1G04.f1     |           |            |                                                                           | -1.24 | -3.59 | 29.26 | 0.0012 |
| SB010021000E01      | Gga.10727 | PAPSS1     | Bifunctional 3'-phosphoadenosine 5'-phosphosulfate synthetase 1           | -1.24 | -2.99 | 29.26 | 0.0057 |
| SB02022A1D03.f1     | Gga.17666 | FBNP1      | Formin-binding protein 1                                                  | -1.24 | -2.88 | 29.26 | 0.0073 |
| SB03028B1C10.f1.A   | Gga.1042  | RPS10      | 40S ribosomal protein S10                                                 | -1.24 | -3.68 | 29.26 | 0.0009 |
| SB02025A1A03.f1     | Gga.1156  | ZNF462     | Zinc finger protein 462                                                   | -1.24 | -3.36 | 29.26 | 0.0022 |
| SB02020A2B05.f1.A   |           |            |                                                                           | -1.23 | -2.93 | 29.26 | 0.0066 |
| SB03020A1A03.f1     | Gga.22508 | C6orf130   | Uncharacterized protein C6orf130                                          | -1.23 | -2.83 | 29.26 | 0.0084 |
| SB03021B1A10.f1     | Gga.17597 | MSI2       | RNA-binding protein Musashi homolog 2                                     | -1.23 | -3.09 | 29.26 | 0.0044 |
| SB02014B1C05.f1     | Gga.17315 | C12orf51-1 | Transmembrane protein C12orf51                                            | -1.23 | -3.21 | 28.26 | 0.0033 |
| SB03022B1E10.f1     | Gga.29151 | OTUD7A     | OTU domain-containing protein 7A                                          | -1.23 | -2.82 | 29.26 | 0.0085 |
| SB03031A1E09.f1     | Gga.22503 | EXOC6      | Exocyst complex component 6                                               | -1.23 | -2.92 | 29.26 | 0.0067 |
| SB03014B1B02.f1     | Gga.30662 | PEX13      | Peroxisomal membrane protein PEX13 (Peroxin-13)                           | -1.22 | -3.59 | 28.26 | 0.0012 |
| SB03051A2H05.f1     | Gga.24279 | RASGEF1B   | Ras-GEF domain-containing family member 1B                                | -1.22 | -2.79 | 29.26 | 0.0092 |
| SB02018A2D06.f1     | Gga.22733 | ALKBH1     | Alkylated DNA repair protein alkB homolog 1                               | -1.22 | -2.81 | 29.26 | 0.0087 |
| SB03034A2A04.f1.M   |           |            |                                                                           | -1.22 | -3.58 | 29.26 | 0.0012 |
| SB02011B1F04.f1     | Gga.31806 | TTC37      | Tetratricopeptide repeat protein 37                                       | -1.22 | -3.71 | 28.26 | 0.0009 |
| SB03016A2G07.f1     | Gga.5964  | UROS       | Uroporphyrinogen-III synthase                                             | -1.22 | -3.07 | 29.26 | 0.0046 |
| SB03020A1G07.f1     | Gga.22540 | USP1       | Ubiquitin carboxyl-terminal hydrolase 1                                   | -1.21 | -2.93 | 27.26 | 0.0068 |
| SB03011B1D06.f1     | Gga.11639 | XPR1       | Xenotropic and polytropic retrovirus receptor 1                           | -1.21 | -2.77 | 29.26 | 0.0097 |
| SB03018A2F08.f1     | Gga.12924 | SGCE       | sarcoglycan, epsilon                                                      | -1.21 | -3.25 | 29.26 | 0.0029 |
| SB02036A2C06.f1     | Gga.19224 | ZXDC       | ZXD family zinc finger C                                                  | -1.21 | -2.94 | 29.26 | 0.0063 |
| SB03028B1G10.f1     | Gga.2542  | TADA2L     | Transcriptional adapter 2-alpha                                           | -1.21 | -2.84 | 29.26 | 0.0082 |
| SB02032A1D01.f2     | Gga.32515 | FBXL3      | F-box/LRR-repeat protein 3 (F-box and leucine-rich repeat protein 3A)     | -1.20 | -3.06 | 29.26 | 0.0047 |
| SB03016A2D07.f1     | Gga.39236 | PLAA       | Phospholipase A-2-activating protein                                      | -1.20 | -2.99 | 29.26 | 0.0056 |
| SB03031A1D11.f1     |           |            |                                                                           | -1.20 | -2.90 | 29.26 | 0.0071 |
| SB03001A1D08.f1     | Gga.38335 | SBF2       | Myotubularin-related protein 13 (SET-binding factor 2)                    | -1.20 | -2.86 | 29.26 | 0.0077 |
| SB02038B2C05.f1     | Gga.15381 | RUFY3      | RUN and FYVE domain containing 3                                          | -1.20 | -2.78 | 29.26 | 0.0095 |
| SB02035B2E07.f1     | Gga.43756 | CRK        | Proto-oncogene C-crk                                                      | -1.20 | -2.96 | 29.26 | 0.0061 |
| SB02038B1G09.f1     | Gga.6283  | LSM8       | LSM8 homolog, U6 small nuclear RNA associated                             | -1.19 | -2.88 | 29.26 | 0.0074 |
| SB03017A1B05.f1     | Gga.8083  | ORMDL2     | ORM1-like protein 2                                                       | -1.19 | -2.80 | 29.26 | 0.0090 |
| SB03018A2G04.f1     | Gga.39790 | ARF4       | ADP-ribosylation factor 4                                                 | -1.19 | -2.98 | 28.26 | 0.0058 |
| SB02014B2G11.f1     | Gga.9325  | UBE2D2     | Ubiquitin-conjugating enzyme E2 D2                                        | -1.19 | -3.06 | 29.26 | 0.0047 |
| SB02034B1A04.f1     | Gga.11467 | SF3B4      | Splicing factor 3B subunit 4 (Spliceosom                                  | -1.19 | -2.80 | 29.26 | 0.0091 |
| SB03031B2E01.f1     | Gga.10459 | CCDC72     | coiled-coil domain containing 72                                          | -1.19 | -2.90 | 27.26 | 0.0073 |
| SB02034B1F09.f1     | Gga.8044  | PRDX1      | Peroxiredoxin-1                                                           | -1.18 | -3.04 | 29.26 | 0.0050 |
| SB03030A1C02.f1     | Gga.28933 | FRMPD4     | FERM and PDZ domain-containing protein 4                                  | -1.18 | -2.99 | 29.26 | 0.0056 |
| SB03007B1C06.f1     | Gga.4601  | LIN7C      | Lin-7 homolog C                                                           | -1.18 | -3.53 | 29.26 | 0.0014 |
| SB02011B1B11.f1     |           |            |                                                                           | -1.17 | -2.80 | 28.26 | 0.0091 |
| SB03007B2G09.f1     | Gga.36752 | LRRC16A    | Leucine-rich repeat-containing protein 16A                                | -1.17 | -2.98 | 29.26 | 0.0058 |
| SB02046A2B05.f1     | Gga.5324  | SYS1       | Protein SYS1 homolog                                                      | -1.17 | -3.47 | 29.26 | 0.0017 |
| SB03004A1A11.f1     | Gga.23549 | AGXT2L1    | Alanine-glyoxylate aminotransferase 2-like 1                              | -1.17 | -3.08 | 29.26 | 0.0045 |
| SB03042B2E06.f1     | Gga.30094 | BCLAF1     | BCL2-associated transcription factor 1                                    | -1.17 | -2.84 | 29.26 | 0.0082 |
| SB02010A2A07.f1     | Hs.125713 | FAM92B     | family with sequence similarity 92, member B                              | -1.17 | -3.02 | 29.26 | 0.0052 |
| SB03029B2B12.f1     | Gga.35990 | ARID1B     | AT-rich interactive domain-containing protein 1B                          | -1.17 | -2.80 | 29.26 | 0.0090 |
| SB02024B1B01.f1     | Gga.5575  | SEC61A2    | Sec61 alpha 2 subunit                                                     | -1.17 | -2.78 | 29.26 | 0.0094 |
| SB02037A1E06.f1     | Gga.4084  | VDAC2      | Voltage-dependent anion-selective channel protein 2                       | -1.17 | -3.09 | 29.26 | 0.0044 |
| SB03006A1B09.f1     | Gga.25964 | SPATA5     | Spermatogenesis-associated protein 5                                      | -1.16 | -3.30 | 29.26 | 0.0025 |
| SB03002B1A04.f1     | Gga.27768 | MRS2L      | Magnesium transporter MRS2L homolog, mitochondrial Precursor              | -1.16 | -3.00 | 29.26 | 0.0055 |
| SB02027A1C06.f1     | Gga.28341 | SLC25A22   | solute carrier family 25 (mitochondrial carrier: glutamate), member 22    | -1.16 | -3.02 | 29.26 | 0.0052 |
| SB03003B2G11.f1     | Gga.9076  | CCNC       | Cyclin-C (hSRB11)                                                         | -1.16 | -2.76 | 29.26 | 0.0099 |
| SB02026A2C06.f1     | Gga.8046  | KRAS       | GTPase KRas Precursor                                                     | -1.15 | -2.83 | 29.26 | 0.0083 |
| SB02025A2G06.f1     | Gga.41380 | RGPD2      | similar to Ran-binding protein 2                                          | -1.13 | -2.78 | 29.26 | 0.0094 |
| SB03043B2F11.f1     | Gga.22011 | CPSF6      | Cleavage and polyadenylation specificity factor subunit 6                 | 1.14  | 2.80  | 29.26 | 0.0091 |
| SB02028A2H06.f1     | Gga.4635  | ST7L       | Suppressor of tumorigenicity protein 7-like protein (ST7-related protein) | 1.14  | 3.20  | 29.26 | 0.0033 |
| SB03035A2F02.f1     | Gga.16518 | FAM49A     | family with sequence similarity 49, member A                              | 1.16  | 2.96  | 29.26 | 0.0060 |
| SB02042B2A08.f1     | Gga.34471 | PHB2       | Prohibitin-2                                                              | 1.16  | 2.76  | 29.26 | 0.0100 |
| SB03015A1A12.f1     | Gga.3116  | TRABD      | TraB domain containing                                                    | 1.16  | 2.92  | 29.26 | 0.0067 |
| SB03018A1E05.f1     | Gga.10045 | VCP        | valosin-containing protein                                                | 1.16  | 3.01  | 29.26 | 0.0054 |
| SB03027B2B09.f1     | Gga.39794 | DASRAA     | chromosomal passenger complex protein Dasra A                             | 1.17  | 2.80  | 29.26 | 0.0089 |
| SB03016B2A01.f1     | Gga.34349 | ZNF853-1   | zinc finger protein 853                                                   | 1.17  | 3.40  | 29.26 | 0.0020 |
| SB02034B2E10.f1     |           |            |                                                                           | 1.17  | 2.90  | 29.26 | 0.0070 |
| SB03014A2A08.f1.A   | Gga.6335  | PDCD10     | Programmed cell death protein 10                                          | 1.17  | 3.20  | 29.26 | 0.0033 |
| SB02031B2A12.f1     | Gga.39326 | KIAA0174   | Uncharacterized protein KIAA0174                                          | 1.17  | 2.79  | 29.26 | 0.0093 |
| SB02024B2A05.f1     | Gga.15110 | SFXN3      | Sideroflexin-3                                                            | 1.17  | 2.79  | 29.26 | 0.0091 |
| SB03019A2F09.f1     | Gga.12210 | TTC1       | Tetratricopeptide repeat protein 1                                        | 1.18  | 2.97  | 29.26 | 0.0059 |
| SB02006B2B09.f1.B   | Gga.3298  | GCSH       | Glycine cleavage system H protein                                         | 1.18  | 2.87  | 29.26 | 0.0076 |
| SB020001000E06      | Gga.1040  | SLC2A1     | Solute carrier family 2, facilitated glucose transporter member 1         | 1.18  | 3.22  | 29.26 | 0.0031 |
| SB02007A1E06.f1.B   |           |            |                                                                           | 1.18  | 3.33  | 29.26 | 0.0023 |
| SB020002000B02.M    | Gga.11749 | CDC42EP3   | Cdc42 effector protein 3                                                  | 1.18  | 2.85  | 29.26 | 0.0080 |
| SB03023B2E01.f1.B   | Gga.2627  | NDUFAB1    | Acyl carrier protein, mitochondrial Precursor                             | 1.19  | 2.85  | 29.26 | 0.0079 |
| SB010010000D12      | Gga.11648 | PHCA       | Phytoceramidease, alkaline                                                | 1.19  | 2.76  | 29.26 | 0.0099 |
| SB03046A2G02.f1     | Gga.5664  | PPP1CC     | Protein phosphatase 1, catalytic subunit, gamma isoform                   | 1.19  | 3.39  | 28.26 | 0.0021 |
| SB03040B1E04.f1     | Gga.30506 | USP44      | Ubiquitin carboxyl-terminal hydrolase 44                                  | 1.20  | 3.13  | 29.26 | 0.0040 |
| SB03012A1D12.f1     | Gga.28392 | OTUD7B     | OTU domain containing 7B                                                  | 1.20  | 2.78  | 29.26 | 0.0094 |
| SB02044A2A09.f1.B.M | Gga.643   | SYT1       | Synaptotagmin-1                                                           | 1.20  | 3.01  | 29.26 | 0.0053 |
| SB02026A1E01.f1.B.W | Gga.793   | C11orf57   | Uncharacterized protein C11orf57                                          | 1.20  | 3.30  | 29.26 | 0.0025 |
| SB02021B1B09.f1     | Gga.5681  | PDCD7      | Programmed cell death protein 7                                           | 1.20  | 2.94  | 29.26 | 0.0064 |
| SB03040A1G07.f1     | Gga.8157  | SNRPD1     | Small nuclear ribonucleoprotein Sm D1                                     | 1.20  | 2.92  | 29.26 | 0.0067 |
| SB010004001C10      | Gga.3302  | CCT4       | T-complex protein 1 subunit delta                                         | 1.20  | 3.21  | 29.26 | 0.0032 |
| SB02024B1D12.f1     | Gga.2333  | C2orf25    | Protein C2orf25, mitochondrial Precursor                                  | 1.20  | 2.83  | 29.26 | 0.0083 |
| SB03026B1C11.f1     | Gga.9751  | MRPL14     | 39S ribosomal protein L14, mitochondrial Precursor                        | 1.20  | 3.11  | 29.26 | 0.0041 |
| SB02027A1E06.f1     | Gga.3876  | ATP6V1B2   | V-type proton ATPase subunit B, brain isoform                             | 1.21  | 2.99  | 29.26 | 0.0056 |
| SB02032A1E03.f2     | Gga.12304 | C18orf55   | chromosome 18 open reading frame 55                                       | 1.21  | 2.77  | 29.26 | 0.0097 |

|                     |           |            |                                                                           |      |      |       |        |
|---------------------|-----------|------------|---------------------------------------------------------------------------|------|------|-------|--------|
| SB03014A2F02.f1     | Gga.12434 | MAP3K7     | Mitogen-activated protein kinase kinase kinase 7                          | 1.21 | 2.81 | 29.26 | 0.0088 |
| SB02044B2B03.f1     | Gga.1218  | LSM1       | LSM1 homolog, U6 small nuclear RNA associated                             | 1.21 | 3.04 | 29.26 | 0.0049 |
| SB02047B1E07.f1     | Gga.39036 | BTF3       | Transcription factor BTF3                                                 | 1.21 | 2.97 | 28.26 | 0.0061 |
| SB02009B1D09.f1     | Gga.1454  | LSM5       | U6 snRNA-associated Sm-like protein LSM5                                  | 1.22 | 3.04 | 29.26 | 0.0049 |
| SB03016B1C06.f1     | Gga.6231  | EIF2A      | Eukaryotic translation initiation factor 2A                               | 1.22 | 2.85 | 29.26 | 0.0080 |
| SB010021000C12      | Gga.4548  | DDX5       | DEAD (Asp-Glu-Ala-Asp) box polypeptide 5                                  | 1.22 | 3.24 | 29.26 | 0.0030 |
| SB02037A1C11.f1     | Gga.7507  | ATP6V0D2   | similar to Ac39/physophilin                                               | 1.22 | 2.87 | 29.26 | 0.0076 |
| SB02016B1D09.f1     | Gga.8976  | ATG9A      | Autophagy-related protein 9A (APG9-like 1)                                | 1.22 | 3.10 | 29.26 | 0.0043 |
| SB03041A1G03.f1     | Gga.5904  | COPS7A     | COP9 signalosome complex subunit 7a                                       | 1.22 | 3.17 | 29.26 | 0.0036 |
| SB02046B1D10.f1     | Gga.17588 | DIMT1L     | Probable dimethyladenosine transferase                                    | 1.22 | 3.08 | 29.26 | 0.0045 |
| SB03042B2D11.f1     | Gga.2712  | RALA       | Ras-related protein Ral-A Precursor                                       | 1.22 | 3.73 | 29.26 | 0.0008 |
| SB02015A1D07.f1     | Gga.23864 | CHKA       | Choline kinase alpha (CK)                                                 | 1.22 | 3.66 | 29.26 | 0.0010 |
| SB03034A1G05.f1.B   | Gga.41866 | ZNF609     | Zinc finger protein 609                                                   | 1.22 | 2.76 | 29.26 | 0.0100 |
| SB02014B2G05.f1     |           |            |                                                                           | 1.23 | 3.25 | 29.26 | 0.0029 |
| SB010023000F01      | Gga.11998 | TPRKB      | TP53RK-binding protein (PRPK-binding protein)                             | 1.23 | 2.97 | 29.26 | 0.0059 |
| SB02022B1B09.f1     | Gga.27485 | TLL1       | Probable tubulin polyglutamylase                                          | 1.23 | 2.81 | 29.26 | 0.0088 |
| SB02047B1D10.f1     | Gga.16654 | NUP50      | Nucleoporin 50 kDa                                                        | 1.23 | 3.16 | 29.26 | 0.0036 |
| SB03009A1A05.f1     | Gga.14457 | POLR1B     | polymerase (RNA) I polypeptide B, 128kDa                                  | 1.23 | 3.22 | 29.26 | 0.0032 |
| SB02024B2G08.f1     | Gga.39572 | AKR1B1     | aldo-keto reductase family 1, member B1 (aldose reductase)                | 1.24 | 2.78 | 29.26 | 0.0094 |
| SB02027B2F07.f1     | Hs.66194  | CTXN3      | Cortixin-3 (Kidney and brain-expressed protein)                           | 1.24 | 5.21 | 29.26 | 0.0000 |
| SB03028B1B05.f1     | Gga.11388 | COQ3       | coenzyme Q3 homolog, methyltransferase (S. cerevisiae)                    | 1.24 | 2.77 | 29.26 | 0.0095 |
| SB03017A2A07.f1     | Gga.8959  | NOL12      | Nucleolar protein 12                                                      | 1.24 | 3.25 | 29.26 | 0.0029 |
| SB03047B1G02.f1     | Gga.15212 | CNTN3      | Contactin-3 Precursor                                                     | 1.24 | 3.01 | 29.26 | 0.0054 |
| SB02047B1E10.f1     | Hs.153521 | KCNC4      | Potassium voltage-gated channel subfamily C member 4                      | 1.24 | 3.18 | 29.26 | 0.0035 |
| SB03010B2G11.f1     |           |            |                                                                           | 1.24 | 2.88 | 29.26 | 0.0074 |
| SB02040A1D10.f1     | Hs.311100 | C3orf75    | chromosome 3 open reading frame 75                                        | 1.25 | 3.01 | 29.26 | 0.0053 |
| SB03050A2F01.f1     | Gga.22320 | SARS       | Seryl-tRNA synthetase, cytoplasmic                                        | 1.25 | 3.25 | 29.26 | 0.0029 |
| SB03049B2E07.f1     | Gga.20231 | DNAJA1     | DnaJ homolog subfamily A member 1                                         | 1.25 | 3.39 | 29.26 | 0.0020 |
| SB03030B2G03.f1     | Gga.42515 | WDR33      | WD repeat-containing protein 33                                           | 1.25 | 3.40 | 29.26 | 0.0020 |
| SB02026A2G12.f1.B   | Gga.21294 | YIPF4      | Protein YIPF4                                                             | 1.25 | 2.81 | 29.26 | 0.0088 |
| SB02034A1H07.f1     |           |            |                                                                           | 1.26 | 3.88 | 29.26 | 0.0005 |
| SB03028B1H04.f1     | Gga.8941  | TXN2       | Thioredoxin, mitochondrial Precursor                                      | 1.26 | 3.69 | 28.26 | 0.0010 |
| SB02043A1H04.f1     | Gga.13490 | CKMT1A     | Creatine kinase, ubiquitous mitochondrial Precursor                       | 1.26 | 2.82 | 29.26 | 0.0086 |
| SB03025B1D05.f2     | Gga.22955 | FKBP4      | FK506-binding protein 4                                                   | 1.27 | 3.33 | 29.26 | 0.0024 |
| SB03017A1E11.f1     | Gga.38332 | ERGIC1     | Endoplasmic reticulum-Golgi intermediate compartment protein 1            | 1.27 | 3.31 | 29.26 | 0.0025 |
| SB03044B2E03.f1.B.M |           |            |                                                                           | 1.27 | 3.00 | 29.26 | 0.0054 |
| SB03030B2B10.f1     | Gga.9582  | RNPC3      | RNA-binding protein 40                                                    | 1.27 | 3.16 | 29.26 | 0.0036 |
| SB02042A1A07.f1     |           |            |                                                                           | 1.27 | 3.09 | 29.26 | 0.0044 |
| SB02024A2H03.f1     | Gga.12108 | MRP63      | Ribosomal protein 63, mitochondrial                                       | 1.27 | 3.64 | 29.26 | 0.0010 |
| SB03037B2D10.f1     | Gga.4684  | TMEM35     | transmembrane protein 35                                                  | 1.28 | 4.61 | 29.26 | 0.0001 |
| SB03019B2F10.f1     | Gga.36586 | ADCK2      | Uncharacterized aarF domain-containing protein kinase 2                   | 1.28 | 2.78 | 29.26 | 0.0095 |
| SB02036A2D08.f1     | Gga.4219  | HSPA5      | Heat shock 70 kDa protein 5                                               | 1.28 | 3.28 | 29.26 | 0.0027 |
| SB02022B2E12.f1     | Gga.7435  | OSBPL1A    | Oxysterol-binding protein-related protein 1                               | 1.28 | 3.18 | 29.26 | 0.0035 |
| SB02040B2G02.f1     | Gga.43613 | B3GAT2     | Galactosylgalactosylxylosylprotein 3-beta-glucuronosyltransferase 2       | 1.28 | 3.08 | 29.26 | 0.0045 |
| SB02006A2E03.f1     |           |            |                                                                           | 1.29 | 2.86 | 29.26 | 0.0077 |
| SB03025B1H05.f2     | Gga.5702  | GPR39      | G protein-coupled receptor 39                                             | 1.29 | 3.89 | 29.26 | 0.0005 |
| SB02023B1C02.f1     | Gga.8074  | TAF15      | TATA box binding protein (TBP)-associated factor, 68kDa                   | 1.29 | 3.07 | 29.26 | 0.0046 |
| SB03044B1B10.f1     | Gga.5900  | DNAJA4     | DnaJ homolog subfamily A member 4                                         | 1.29 | 4.05 | 29.26 | 0.0003 |
| SB02020A1B09.f1     | Gga.21673 | ERMN       | Ermin (Juxtandoin)                                                        | 1.29 | 3.15 | 29.26 | 0.0038 |
| SB010004001B01      | Gga.9053  | XBP1       | X-box-binding protein 1 (XBP-1)                                           | 1.30 | 3.40 | 29.26 | 0.0020 |
| SB02003B1B10.f1     | Gga.8796  | COPG       | Coatomeer subunit gamma                                                   | 1.30 | 3.55 | 29.26 | 0.0013 |
| SB03016B2A06.f1     |           |            |                                                                           | 1.30 | 3.13 | 29.26 | 0.0039 |
| SB02044B2E10.f1     | Gga.17356 | SFRS8      | Splicing factor, arginine/serine-rich 8                                   | 1.30 | 3.45 | 29.26 | 0.0017 |
| SB010015000A11      |           |            |                                                                           | 1.30 | 2.96 | 29.26 | 0.0061 |
| SB03036B1H10.f1     | Gga.34734 | NPTXR      | Neuronal pentraxin receptor                                               | 1.30 | 4.86 | 29.26 | 0.0000 |
| SB03021A1D05.f1     | Gga.39100 | LRWD1      | Leucine-rich repeat and WD repeat-containing protein 1                    | 1.31 | 3.00 | 29.26 | 0.0055 |
| SB03049A1G10.f1     | Gga.39684 | ST6GALNAC2 | Alpha-N-acetylgalactosaminide alpha-2,6-sialyltransferase 2               | 1.31 | 3.06 | 29.26 | 0.0047 |
| SB03010B1F10.f1     | Gga.3178  | DACH2      | Dachshund homolog 2                                                       | 1.32 | 2.91 | 29.26 | 0.0068 |
| SB02021A2H02.f1     |           |            |                                                                           | 1.32 | 3.42 | 29.26 | 0.0019 |
| SB03029A2H05.f1     | Gga.4678  | SCCPDH     | Probable saccharopine dehydrogenase                                       | 1.33 | 3.76 | 28.26 | 0.0008 |
| SB02028A1G12.f1     | Gga.1365  | UBE2H      | Ubiquitin-conjugating enzyme E2 H                                         | 1.33 | 2.79 | 29.26 | 0.0093 |
| SB03046A2E03.f1     | Gga.30265 | INPP4A     | Type I inositol-3,4-bisphosphate 4-phosphatase                            | 1.34 | 2.83 | 29.26 | 0.0084 |
| SB03030B1H12.f1     |           |            |                                                                           | 1.34 | 2.85 | 29.26 | 0.0078 |
| SB03048B2F10.f1     | Gga.9616  | DCUN1D4    | Defective in cullin neddylation protein 1-like protein 4                  | 1.34 | 3.11 | 28.26 | 0.0043 |
| SB03043B1D01.f1     | Gga.12424 | MGAM       | maltase-glucoamylase (alpha-glucoosidase)                                 | 1.34 | 3.16 | 29.26 | 0.0037 |
| SB03041B1A02.f1.B   | Gga.10026 | VPS37B     | Vacuolar protein sorting-associated protein 37B                           | 1.34 | 4.03 | 29.26 | 0.0004 |
| SB02029B2D06.f1     | Gga.2155  | ATP1A1     | Sodium/potassium-transporting ATPase subunit alpha-1 Precursor            | 1.35 | 3.36 | 29.26 | 0.0022 |
| SB03005B2B04.f1     |           |            |                                                                           | 1.35 | 2.98 | 29.26 | 0.0058 |
| SB02005A2E12.f1     | Gga.1946  | C5orf42    | Uncharacterized protein C5orf42                                           | 1.35 | 2.93 | 28.26 | 0.0066 |
| SB02013B2B02.f1     |           |            |                                                                           | 1.36 | 3.11 | 29.26 | 0.0041 |
| SB02012B2D07.f1     | Gga.39236 | PLAA       | Phospholipase A-2-activating protein                                      | 1.36 | 3.70 | 29.26 | 0.0009 |
| SB02037B1G04.f1     | Gga.3869  | PPP3CA     | protein phosphatase 3 (formerly 2B), catalytic subunit, alpha isoform     | 1.36 | 2.98 | 29.26 | 0.0058 |
| SB03004B1E12.f1     | Gga.31942 | MALT1-1    | Mucosa-associated lymphoid tissue lymphoma translocation protein 1        | 1.37 | 2.87 | 29.26 | 0.0076 |
| SB02016B1C02.f1     | Gga.5145  | CDV3       | Protein CDV3 homolog                                                      | 1.38 | 3.39 | 29.26 | 0.0020 |
| SB03003A1G12.f1     |           |            |                                                                           | 1.38 | 2.96 | 29.26 | 0.0060 |
| SB02020B1D09.f1     |           |            |                                                                           | 1.38 | 3.05 | 29.26 | 0.0048 |
| SB03049A2C10.f1     | Gga.13812 | PDE1A      | Calcium/calmodulin-dependent 3',5'-cyclic nucleotide phosphodiesterase 1A | 1.39 | 2.87 | 29.26 | 0.0075 |
| SB010022000B04      | Gga.27568 | TRAF1      | TRAF-interacting protein (RING finger protein 206)                        | 1.39 | 2.93 | 29.26 | 0.0065 |
| SB03001A2H11.f1     | Gga.17943 | ROCK2      | Rho-associated protein kinase 2                                           | 1.39 | 3.08 | 29.26 | 0.0045 |
| SB02049B2D01.f1     | Gga.7601  | GALNS      | N-acetylgalactosamine-6-sulfatase Precursor                               | 1.40 | 3.30 | 29.26 | 0.0026 |
| SB03005B2C11.f1.B   | Gga.1208  | DDX21      | DEAD (Asp-Glu-Ala-Asp) box polypeptide 21                                 | 1.40 | 2.77 | 29.26 | 0.0096 |
| SB03012A1G01.f1     | Gga.10157 | PROS1      | protein S (alpha)                                                         | 1.41 | 2.91 | 29.26 | 0.0068 |
| SB02042B2C04.f1.B   |           |            |                                                                           | 1.41 | 2.76 | 29.26 | 0.0098 |
| SB03013B2A01.f1     | Gga.8300  | DLAT       | Dihydropyridyllysine-residue acetyltransferase                            | 1.41 | 2.85 | 29.26 | 0.0079 |
| SB010007000E12      | Gga.5334  | RGS4       | Regulator of G-protein signaling 4                                        | 1.41 | 3.54 | 27.26 | 0.0015 |
| SB03021A1A12.f1     |           |            |                                                                           | 1.43 | 2.93 | 29.26 | 0.0066 |
| SB02034A1G11.f1     | Gga.4219  | HSPA5      | Heat shock 70 kDa protein 5                                               | 1.43 | 3.78 | 29.26 | 0.0007 |
| SB03005B2F01.f1     | Gga.5629  | PLEKHG4    | Pleckstrin homology domain-containing family G member 4                   | 1.44 | 2.76 | 29.26 | 0.0100 |

|                  |           |         |                                                                           |      |      |       |        |
|------------------|-----------|---------|---------------------------------------------------------------------------|------|------|-------|--------|
| SB02010B2A04.f1  |           |         |                                                                           | 1.47 | 2.82 | 28.26 | 0.0087 |
| SB03030A2C10.f1  |           |         |                                                                           | 1.50 | 3.21 | 29.26 | 0.0032 |
| SB03040B2E07.f1  | Gga.822   | ALDH4A1 | aldehyde dehydrogenase 4 family, member A1                                | 1.51 | 2.95 | 29.26 | 0.0062 |
| SB02015B2H02.f1  |           |         |                                                                           | 1.53 | 3.57 | 29.26 | 0.0013 |
| SB03049A2F11.f1  | Gga.16800 | MAPRE1  | Microtubule-associated protein RP/EB family member 1                      | 1.54 | 5.29 | 29.26 | 0.0000 |
| SB02026A2G10.f1  | Gga.1230  | DNAJC12 | DnaJ homolog subfamily C member 12                                        | 1.55 | 3.08 | 29.26 | 0.0044 |
| SB03026A1B07.f1  |           |         |                                                                           | 1.57 | 3.48 | 29.26 | 0.0016 |
| SB02030B1F03.f1  |           |         |                                                                           | 1.59 | 3.22 | 29.26 | 0.0031 |
| SB02020B2E05.f1  | Gga.28057 | GTF2F2  | general transcription factor IIF, polypeptide 2, 30kDa                    | 1.67 | 4.69 | 29.26 | 0.0001 |
| SB02018B2F10.f1  | Gga.9380  | PXK     | PX domain-containing protein kinase-like protein                          | 1.68 | 2.93 | 29.26 | 0.0065 |
| SB03009B2H04.f1  | Gga.5799  | P4HA2   | Prolyl 4-hydroxylase subunit alpha-2 Precursor                            | 1.69 | 4.51 | 29.26 | 0.0001 |
| SB03038B2D08.f1  | Gga.40202 | KNDC1   | Protein very KIND                                                         | 1.70 | 2.99 | 29.26 | 0.0056 |
| SB02020A2A06.f1  | Gga.24400 | HACL1   | 2-hydroxyacyl-CoA lyase 1                                                 | 1.71 | 2.96 | 29.26 | 0.0060 |
| SB03044A2D03.f1  | Hs.719230 | HSPA2   | Heat shock 70 kDa protein 2                                               | 1.75 | 4.42 | 29.26 | 0.0001 |
| SB010007000B05.A |           |         |                                                                           | 1.81 | 3.26 | 29.26 | 0.0028 |
| SB03047B2G11.f1  |           |         |                                                                           | 1.85 | 3.21 | 29.26 | 0.0032 |
| SB02044B1A07.f1  | Gga.2902  | HBA1    | hemoglobin, alpha 1                                                       | 1.92 | 3.02 | 29.26 | 0.0052 |
| SB03046A2H10.f1  |           |         |                                                                           | 1.97 | 6.03 | 29.26 | 0.0000 |
| SB03037B2H05.f1  | Hs.719230 | HSPA2   | Heat shock 70 kDa protein 2                                               | 2.04 | 6.15 | 29.26 | 0.0000 |
| SB02016A2B10.f1  | Gga.45780 | SLC6A5  | solute carrier family 6 (neurotransmitter transporter, glycine), member 5 | 2.76 | 2.83 | 29.26 | 0.0083 |
| SB02010B2A12.f1  | Gga.10763 | SLC6A4  | Sodium-dependent serotonin transporter (5HT transporter)                  | 3.29 | 2.85 | 29.26 | 0.0080 |
