# Supplementary material for: Seasonal Differences of Gene Expression Profiles in Song Sparrow (Melospiza melodia) Hypothalamus in Relation to Territorial Aggression
Source: PubMed Central journal article supplement (PMC2780717; doi:10.1371/journal.pone.0008182), 2009-12-04
Supplement: pone.0008182.s003.pdf [file pone.0008182.s003.pdf]

| Spot ID             | UniGene ID | HGNC_symbol | Gene Description                                                           | Fold Change<br>SE vs. SC | T<br>Statistic | df    | P-value |
|---------------------|------------|-------------|----------------------------------------------------------------------------|--------------------------|----------------|-------|---------|
| SB03032B1E02.f1     | Gga.28126  | SMARCA1     | SWI/SNF related matrix associated actin dependent regulator of chromatin 1 | -5.65                    | -2.90          | 29.26 | 0.0071  |
| SB03014B2H11.f1     | Hs.284491  | PDXK        | Pyridoxal (pyridoxine, vitamin B6) kinase                                  | -2.14                    | -3.08          | 29.26 | 0.0045  |
| SB010007000B05.A    | Gga.16601  | NKAIN2      | Na+/K+ transporting ATPase interacting 2                                   | -1.76                    | -2.98          | 29.26 | 0.0058  |
| SB02006A2D09.f1     | Gga.39766  | KIAA1609    | KIAA1609                                                                   | -1.61                    | -2.95          | 29.26 | 0.0062  |
| SB03026A1G04.f1     | Gga.23904  | LAMA1       | Laminin alpha-1 chain precursor                                            | -1.47                    | -3.48          | 29.26 | 0.0016  |
| SB02047A2H04.f1     | Gga.39410  | ZDHHC7      | Zinc finger, DHHC-type containing 7                                        | -1.45                    | -3.35          | 28.26 | 0.0023  |
| SB03043B1D06.f1     | Gga.33813  | VLLH2748    | Similar to VLLH2748                                                        | -1.37                    | -2.79          | 29.26 | 0.0091  |
| SB02018B2H09.f1     | Gga.4723   | LECT1       | Leukocyte cell derived chemotaxin 1                                        | -1.35                    | -2.76          | 29.26 | 0.0099  |
| SB02027A2G04.f1     | Gga.5288   | TEF         | Thyrotroph embryonic factor                                                | -1.33                    | -3.52          | 29.26 | 0.0014  |
| SB02008A1D12.f1     | Hs.404088  | HAUS8       | HAUS augmin-like complex, subunit 8                                        | -1.33                    | -2.89          | 29.26 | 0.0073  |
| SB02013B1E12.f1     | Gga.11040  | CCDC45      | Coiled-coil domain containing 45                                           | -1.31                    | -3.01          | 29.26 | 0.0054  |
| SB02013B1C10.f1     |            |             |                                                                            | -1.31                    | -2.76          | 29.26 | 0.0099  |
| SB03025B1H05.f2     | Hs.590869  | NTSR1       | Neurotensin receptor type 1                                                | -1.29                    | -3.75          | 29.26 | 0.0008  |
| SB02009A1H07.f1     |            |             |                                                                            | -1.28                    | -3.24          | 29.26 | 0.0030  |
| SB03032A2E11.f1     | Gga.44093  | TBCE        | Tubulin-specific chaperone E                                               | -1.28                    | -2.96          | 29.26 | 0.0060  |
| SB02012A1G11.f1     | Gga.4882   | ASB7        | Ankyrin repeat and SOCS box-containing 7                                   | -1.27                    | -2.85          | 29.26 | 0.0079  |
| SB02044B2E10.f1     | Gga.17356  | SFRS8       | Splicing factor, arginine/serine-rich 8                                    | -1.26                    | -2.95          | 29.26 | 0.0062  |
| SB03029A1E07.f1.B   | Hs.159234  | FOXE1       | Forkhead box E1                                                            | -1.24                    | -2.92          | 29.26 | 0.0066  |
| SB02024B2A05.f1     | Gga.15110  | SFXN3       | Sideroflexin-1                                                             | -1.23                    | -3.47          | 29.26 | 0.0017  |
| SB03017A2A07.f1     | Gga.8959   | NOL12       | Nucleolar protein 12                                                       | -1.22                    | -2.89          | 29.26 | 0.0071  |
| SB03025B2A08.f2     | Gga.22773  | SETD1B      | SET domain containing 1B                                                   | -1.22                    | -3.05          | 29.26 | 0.0048  |
| SB02023A2E10.f1     | Gga.4296   | CLK3        | CDC-like kinase 3                                                          | -1.21                    | -3.00          | 29.26 | 0.0055  |
| SB03040A1E06.f1     | Gga.16820  | PHF13       | PHD finger protein 13                                                      | -1.21                    | -3.08          | 29.26 | 0.0044  |
| SB010002000B12      | Gga.1342   | KIF5B       | Kinesin family member 5B                                                   | -1.21                    | -3.13          | 29.26 | 0.0040  |
| SB03003A1E11.f1     | Gga.17826  | OXCT1       | 3-oxoacid CoA transferase 1                                                | -1.20                    | -3.15          | 29.26 | 0.0037  |
| SB03044B2F07.f1     | Gga.18314  | NSD1        | Nuclear receptor binding SET domain protein 1                              | -1.20                    | -2.76          | 29.26 | 0.0099  |
| SB03018B1E09.f1     | Hs.517262  | SON         | SON DNA binding protein                                                    | -1.19                    | -2.88          | 29.26 | 0.0075  |
| SB03009B1F02.f1     | Gga.35033  | RND3        | Rho-related GTP-binding protein RhoE                                       | -1.19                    | -3.26          | 29.26 | 0.0028  |
| SB02041A1A03.f1     | Gga.22563  | KRR1        | KRR1, small subunit (SSU) processome component                             | -1.18                    | -3.25          | 29.26 | 0.0029  |
| SB02017B2G03.f1     | Gga.39704  | KLHL18      | Kelch-like protein 18                                                      | -1.17                    | -2.76          | 29.26 | 0.0098  |
| SB03051B1F05.f1.B.M |            |             |                                                                            | -1.15                    | -2.76          | 29.26 | 0.0098  |
| SB02037B1G10.f1     | Gga.39935  | ATP5G3      | ATP synthase, H+ transporting, mitochondrial F0 complex, subunit C3        | 1.14                     | 2.78           | 29.26 | 0.0094  |
| SB03005A1G05.f1     | Gga.22077  | LUC7L2      | LUC7-like 2                                                                | 1.15                     | 2.85           | 29.26 | 0.0079  |
| SB02034B1B11.f1     | Gga.27810  | RAB11FIP4   | RAB11 family interacting protein 4 (class II)                              | 1.15                     | 2.79           | 29.26 | 0.0092  |
| SB02022A2D12.f1     | Gga.12569  | FBNP1L      | Formin binding protein 1-like                                              | 1.16                     | 3.12           | 29.26 | 0.0040  |
| SB03004A1A11.f1     | Gga.23549  | AGXT2L1     | Alanine-glyoxylate aminotransferase 2-like 1                               | 1.16                     | 2.81           | 29.26 | 0.0087  |
| SB03015B1G11.f1     | Gga.3020   | ACTR2       | Actin-like protein 2                                                       | 1.20                     | 2.80           | 29.26 | 0.0089  |
| SB02008A1D09.f1     | Gga.35490  | AAK1        | AP2 associated kinase 1                                                    | 1.20                     | 3.16           | 29.26 | 0.0036  |
| SB02038B1E05.f1     |            |             |                                                                            | 1.21                     | 2.91           | 29.26 | 0.0068  |
| SB02032B1D09.f2     | Gga.1029   | RBBP4       | Retinoblastoma binding protein 4                                           | 1.21                     | 3.10           | 29.26 | 0.0043  |
| SB02028A1F12.f1     |            |             |                                                                            | 1.23                     | 2.93           | 29.26 | 0.0065  |
| SB03017A1B05.f1     | Gga.8083   | ORMDL1      | ORM1-like protein 1                                                        | 1.23                     | 3.12           | 29.26 | 0.0040  |
| SB010009001H01      | Gga.3222   | LIMK2       | LIM domain kinase 2                                                        | 1.23                     | 2.99           | 29.26 | 0.0057  |
| SB03034B1C11.f1.A   |            |             |                                                                            | 1.24                     | 2.99           | 29.26 | 0.0056  |
| SB03015B1E05.f1     |            |             |                                                                            | 1.24                     | 3.10           | 29.26 | 0.0043  |
| SB03013A1H09.f1     | Gga.7961   | C1orf128    | chromosome 1 open reading frame 128                                        | 1.26                     | 2.94           | 29.26 | 0.0064  |
| SB02010A2C05.f1     | Gga.8061   | HSCB        | Similar to J-type co-chaperone HSC20                                       | 1.26                     | 3.29           | 29.26 | 0.0026  |
| SB03029A2C01.f1     | Gga.12450  | GATAD1      | GATA zinc finger domain containing 1                                       | 1.26                     | 2.87           | 29.26 | 0.0076  |
| SB03014B1B02.f1     | Gga.30662  | PEX13       | Peroxisomal membrane protein PEX13                                         | 1.27                     | 3.94           | 28.26 | 0.0005  |
| SB02030A2A11.f1     | Gga.2564   | AP1S2       | Adaptor-related protein complex 1, sigma 2 subunit                         | 1.28                     | 3.08           | 29.26 | 0.0045  |
| SB03024B2A05.f1     | Gga.9061   | RTCD1       | RNA 3-terminal phosphate cyclase                                           | 1.29                     | 3.51           | 29.26 | 0.0015  |
| SB03044B2B12.f1     | Gga.11469  | KCTD20      | Potassium channel tetramerisation domain containing 20                     | 1.29                     | 3.37           | 29.26 | 0.0021  |
| SB02028B2A07.f1     | Gga.17250  | CDKN1B      | Cyclin-dependent kinase inhibitor 1B (p27, Kip1)                           | 1.31                     | 3.33           | 29.26 | 0.0024  |
| SB02046B2A12.f1     | Gga.4136   | GPC5        | Glypican-5 precursor                                                       | 1.32                     | 4.17           | 29.26 | 0.0002  |
| SB03031A2G05.f1     | Gga.15373  | DDX31       | Probable ATP-dependent RNA helicase DDX31                                  | 1.32                     | 3.32           | 29.26 | 0.0024  |
| SB02018A1F11.f1     | Gga.34770  | FAM120A     | Family with sequence similarity 120A                                       | 1.33                     | 2.77           | 29.26 | 0.0096  |
| SB03032B2E02.f1     | Gga.2852   | ACVR2A      | Activin receptor type 2 precursor                                          | 1.33                     | 3.11           | 29.26 | 0.0042  |
| SB03046B2A03.f1     | Hs.370303  | ZNF366      | Zinc finger protein 366                                                    | 1.36                     | 3.09           | 29.26 | 0.0044  |
| SB03050A1C01.f1     | Gga.17065  | CCDC66      | Coiled-coil domain containing 66                                           | 1.39                     | 2.92           | 29.26 | 0.0066  |
| SB03002A2F12.f1     | Gga.23549  | AGXT2L1     | Alanine-glyoxylate aminotransferase 2-like 1                               | 1.48                     | 3.83           | 29.26 | 0.0006  |
| SB03041A2C02.f1     | Gga.5899   | FAM125B     | Protein FAM125B                                                            | 1.50                     | 3.76           | 29.26 | 0.0008  |
| SB03043B1E08.f1     | Gga.2937   | NFKBIA      | NF-kappaB inhibitor alpha                                                  | 1.52                     | 3.58           | 29.26 | 0.0012  |
| SB02049B2B06.f1     | Hs.523012  | DDIT4       | DNA-damage-inducible transcript 4                                          | 1.56                     | 3.53           | 29.26 | 0.0014  |
| SB03036B1C02.f1     | Gga.5101   | ZBTB16      | Zinc finger and BTB domain containing 16                                   | 1.71                     | 5.63           | 29.26 | 0.0000  |
| SB02027A2C02.f1     | Gga.40320  | GLP2R       | Glucagon-like peptide 2 receptor Precursor                                 | 1.77                     | 4.26           | 29.26 | 0.0002  |
| SB03034B2D05.f1     | Gga.5101   | ZBTB16      | Zinc finger and BTB domain containing 16                                   | 1.86                     | 4.79           | 29.26 | 0.0000  |
| SB02022A2D01.f1     | Gga.11726  | GADD45B     | Growth arrest and DNA-damage-inducible, beta                               | 2.16                     | 5.16           | 29.26 | 0.0000  |
