# Supplementary material for: Seasonal Differences of Gene Expression Profiles in Song Sparrow (Melospiza melodia) Hypothalamus in Relation to Territorial Aggression
Source: PubMed Central journal article supplement (PMC2780717; doi:10.1371/journal.pone.0008182), 2009-12-04
Supplement: pone.0008182.s004.pdf [file pone.0008182.s004.pdf]

| Spot ID             | Unigene_ID | HGNC_symbol | Gene Description                                                       | Fold Change<br>AE vs. AC | T<br>Statistics | df    | P-value |
|---------------------|------------|-------------|------------------------------------------------------------------------|--------------------------|-----------------|-------|---------|
| SB010001001F02      | Hs.439530  | DYRK4       | Dual-specificity tyrosine-(Y)-phosphorylation regulated kinase 4       | -2.66                    | -2.88           | 29.26 | 0.0073  |
| SB02025B1D06.f1     | Gga.10284  | VPS13C      | Vacuolar protein sorting 13 homolog C                                  | -2.42                    | -3.36           | 29.26 | 0.0022  |
| SB02031B1D01.f1     |            |             |                                                                        | -2.39                    | -2.91           | 29.26 | 0.0068  |
| SB03011A2F09.f1     | Hs.471779  | LRRFIP1     | Leucine rich repeat (in FLII) interacting protein 1                    | -2.19                    | -2.87           | 29.26 | 0.0075  |
| SB03046A1H01.f1     |            |             |                                                                        | -1.90                    | -2.97           | 29.26 | 0.0059  |
| SB02039A2G02.f1     |            |             |                                                                        | -1.89                    | -3.04           | 29.26 | 0.0050  |
| SB03048B1D05.f1     | Gga.32092  | NPY1R       | Neuropeptide Y receptor Y1                                             | -1.88                    | -2.76           | 29.26 | 0.0098  |
| SB03002A1B03.f1     | Gga.19035  | FAM26E      | Family with sequence similarity 26, member E                           | -1.82                    | -2.81           | 29.26 | 0.0087  |
| SB03046B1A02.f1.A   | Gga.744    | GATA3       | GATA binding protein 3                                                 | -1.79                    | -2.81           | 29.26 | 0.0087  |
| SB03017A2H04.f1     | Gga.12177  | IWS1        | IWS1 homolog                                                           | -1.62                    | -2.90           | 29.26 | 0.0070  |
| SB03035B1E06.f1     | Hs.8595    | MIIP        | migration and invasion inhibitory protein                              | -1.51                    | -2.83           | 29.26 | 0.0084  |
| SB03045B2F09.f1     | Gga.40476  | DGKH        | Diacylglycerol kinase eta (DAG kinase eta)                             | -1.47                    | -2.91           | 29.26 | 0.0068  |
| SB03038B2F02.f1     | Gga.30037  | CAND1       | Cullin-associated and neddylation-dissociated 1                        | -1.46                    | -3.82           | 29.26 | 0.0006  |
| SB02038A1G05.f1     | Gga.19639  | GPR133      | G protein-coupled receptor 133                                         | -1.46                    | -2.88           | 29.26 | 0.0075  |
| SB03014B1H03.f1     | Hs.592130  | NR1D1       | Nuclear receptor subfamily 1, group D, member 1                        | -1.42                    | -2.81           | 29.26 | 0.0087  |
| SB02035B1A08.f1     | Gga.4549   | NONO        | Non-POU domain containing, octamer-binding                             | -1.40                    | -3.80           | 29.26 | 0.0007  |
| SB02028A2H11.f1     | Gga.2827   | TIMP3       | TIMP metalloproteinase inhibitor 3                                     | -1.39                    | -2.84           | 29.26 | 0.0081  |
| SB02034B1H05.f1     | Gga.15742  | LARP4       | La ribonucleoprotein domain family, member 4                           | -1.39                    | -3.25           | 28.26 | 0.0030  |
| SB02003B2H08.f1     | Gga.29968  | ACOT11      | Acyl-CoA thioesterase 11                                               | -1.38                    | -3.06           | 29.26 | 0.0047  |
| SB03029A1A05.f1     |            |             |                                                                        | -1.38                    | -2.89           | 29.26 | 0.0072  |
| SB02009B1H02.f1     | Gga.14856  | RPS6KA5     | Ribosomal protein S6 kinase, 90kDa, polypeptide 5                      | -1.37                    | -3.10           | 29.26 | 0.0042  |
| SB02013A2C04.f1     | Gga.12457  | C14orf159   | Chromosome 14 open reading frame 159                                   | -1.36                    | -3.37           | 29.26 | 0.0021  |
| SB02007B2A12.f1     | Gga.23166  | HPS3        | Hermansky-Pudlak syndrome 3                                            | -1.34                    | -2.84           | 29.26 | 0.0081  |
| SB03028A2B06.f1.A   | Gga.22540  | USP1        | Ubiquitin specific peptidase 1                                         | -1.34                    | -2.80           | 29.26 | 0.0089  |
| SB02005A1C11.f1     | Gga.26298  | KLHL12      | Kelch-like 12                                                          | -1.33                    | -2.99           | 29.26 | 0.0057  |
| SB010022000E01      |            |             |                                                                        | -1.33                    | -2.86           | 29.26 | 0.0077  |
| SB03035A2C11.f1     | Hs.370111  | C2orf77     | Chromosome 2 open reading frame 77                                     | -1.32                    | -2.81           | 29.26 | 0.0087  |
| SB03025B2H09.f2     | Gga.31268  | C3orf63     | Chromosome 3 open reading frame 63                                     | -1.32                    | -3.32           | 29.26 | 0.0024  |
| SB02033B1F08.f1     | Gga.11963  | BLZF1       | Basic leucine zipper nuclear factor 1 (JEM-1)                          | -1.31                    | -3.07           | 29.26 | 0.0046  |
| SB03049B1F12.f1     | Gga.1116   | NEDD1       | Neural precursor cell expressed, developmentally down-regulated 1      | -1.31                    | -2.80           | 29.26 | 0.0091  |
| SB03048A2G09.f1     |            |             |                                                                        | -1.31                    | -2.81           | 29.26 | 0.0088  |
| SB02027B1F01.f1     | Gga.966    | PTPRJ       | Protein tyrosine phosphatase, receptor type, J                         | -1.30                    | -3.04           | 29.26 | 0.0049  |
| SB03001B1G07.f1     | Gga.5288   | TEF         | Thyrotrophic embryonic factor                                          | -1.29                    | -3.94           | 29.26 | 0.0005  |
| SB02023B2E08.f1     | Gga.12008  | GYG2        | Glycogenin 2                                                           | -1.28                    | -2.76           | 29.26 | 0.0099  |
| SB010011000C07      | Gga.14840  | C21orf66    | Chromosome 21 open reading frame 66                                    | -1.28                    | -2.90           | 29.26 | 0.0070  |
| SB02048A1A09.f1     | Gga.63     | NEDD4L      | Neural precursor cell expressed, developmentally down-regulated 4-like | -1.27                    | -2.83           | 29.26 | 0.0084  |
| SB02047A2G08.f1     | Gga.21092  | PHF20L1     | PHD finger protein 20-like 1                                           | -1.27                    | -3.27           | 29.26 | 0.0027  |
| SB03023A2C04.f1     | Gga.26340  | TRAK1       | Trafficking protein, kinesin binding 1                                 | -1.27                    | -3.01           | 29.26 | 0.0054  |
| SB03009B1B05.f1     | Gga.14586  | SCN2A       | Sodium channel, voltage-gated, type II, alpha subunit                  | -1.27                    | -2.83           | 29.26 | 0.0083  |
| SB03044A2H07.f1     | Gga.2720   | CXCL14      | Chemokine (C-X-C motif) ligand 14                                      | -1.26                    | -3.04           | 29.26 | 0.0050  |
| SB02010B1D10.f1     | Gga.30233  | RPS6KA2     | Ribosomal protein S6 kinase, 90kDa, polypeptide 2                      | -1.26                    | -3.00           | 29.26 | 0.0054  |
| SB02005B2D12.f1     | Gga.3712   | GAD2        | Glutamate decarboxylase 2                                              | -1.25                    | -2.92           | 29.26 | 0.0066  |
| SB02024A2D05.f1     |            |             |                                                                        | -1.25                    | -2.78           | 29.26 | 0.0094  |
| SB02027B1H10.f1     |            |             |                                                                        | -1.25                    | -3.04           | 29.26 | 0.0050  |
| SB02013A1B04.f1     | Hs.529272  | MARCH7      | Membrane-associated ring finger (C3HC4) 7                              | -1.25                    | -2.88           | 29.26 | 0.0073  |
| SB03009A1H08.f1     | Gga.2144   | HSF2        | Heat shock transcription factor 2                                      | -1.23                    | -2.89           | 29.26 | 0.0072  |
| SB03022B1E10.f1     | Gga.30899  | OTUD7A      | OTU domain containing 7A                                               | -1.23                    | -2.78           | 29.26 | 0.0094  |
| SB03016A2E12.f1     | Gga.29976  | SYNE1       | Spectrin repeat containing, nuclear envelope 1                         | -1.23                    | -2.80           | 29.26 | 0.0090  |
| SB03018A2C06.f1     |            |             |                                                                        | -1.22                    | -2.92           | 29.26 | 0.0066  |
| SB03042A2B02.f1     | Gga.30026  | VANGL1      | Vang-like 1 (van gogh, Drosophila)                                     | -1.22                    | -3.06           | 29.26 | 0.0047  |
| SB03031A1E09.f1     | Hs.655657  | EXOC6       | Exocyst complex component 6                                            | -1.22                    | -2.80           | 29.26 | 0.0089  |
| SB02021A1H10.f1     | Gga.37956  | NOL8        | Nucleolar protein 8                                                    | -1.21                    | -3.16           | 29.26 | 0.0036  |
| SB03023A2B06.f1     | Gga.1184   | PSMB4       | Proteasome subunit, beta type, 4                                       | -1.21                    | -3.65           | 29.26 | 0.0010  |
| SB02038B2G02.f1.B.E | Gga.2620   | TTR         | Transthyretin                                                          | -1.21                    | -2.78           | 29.26 | 0.0095  |
| SB03002A2E10.f1     | Gga.22662  | PLTP        | Phospholipid transfer protein                                          | -1.21                    | -3.11           | 29.26 | 0.0041  |
| SB03029B1E07.f1     | Gga.42209  | PDS5B       | PDS5, regulator of cohesion maintenance, homolog B                     | -1.21                    | -2.95           | 29.26 | 0.0061  |
| SB03038A1F02.f1     | Gga.6024   | PNRC1       | Proline-rich nuclear receptor coactivator 1                            | -1.20                    | -2.92           | 29.26 | 0.0067  |
| SB02031A1E06.f1     | Gga.8788   | SLC25A29    | Solute carrier family 25, member 29                                    | -1.20                    | -2.81           | 29.26 | 0.0089  |
| SB03019B1G08.f1     |            |             |                                                                        | -1.20                    | -2.91           | 29.26 | 0.0068  |
| SB03012A2C05.f1     | Gga.3128   | THYN1       | Thymocyte nuclear protein 1                                            | -1.20                    | -3.14           | 28.26 | 0.0039  |
| SB02010B2F06.f1     |            |             |                                                                        | -1.20                    | -2.78           | 29.26 | 0.0094  |
| SB02018B1A11.f1     | Gga.9497   | ZFYVE21     | Zinc finger, FYVE domain containing 21                                 | -1.20                    | -2.78           | 29.26 | 0.0094  |
| SB02009B2F04.f1     | Gga.5775   | HNRNPA3     | Heterogeneous nuclear ribonucleoprotein A3                             | -1.19                    | -3.88           | 29.26 | 0.0005  |
| SB03021A1F06.f1     | Gga.10406  | CYLD        | Cylindromatosis (turban tumor syndrome)                                | -1.19                    | -2.85           | 29.26 | 0.0080  |
| SB02046B2D02.f1     |            |             |                                                                        | -1.19                    | -2.78           | 29.26 | 0.0094  |
| SB03017A2F11.f1     | Gga.40014  | CGGBP1      | CGG triplet repeat binding protein 1                                   | -1.18                    | -3.18           | 29.26 | 0.0035  |
| SB02043A2E11.f1     | Gga.34530  | ATXN7       | Ataxin 7-like 1                                                        | -1.18                    | -2.87           | 29.26 | 0.0076  |
| SB02027A2G05.f1     | Gga.28057  | GTF2F2      | General transcription factor IIF, polypeptide 2, 30kDa                 | -1.18                    | -3.45           | 29.26 | 0.0017  |
| SB02022A2D12.f1     | Gga.12569  | FBNP1L      | Formin binding protein 1-like                                          | -1.17                    | -3.51           | 29.26 | 0.0015  |
| SB010018000G02.B    | Gga.17067  | ALG9        | Asparagine-linked glycosylation 9 homolog                              | -1.17                    | -2.78           | 29.26 | 0.0093  |
| SB02025B1A04.f1     | Gga.11465  | DCUN1D5     | Defective in cullin neddylation 1, domain containing 5                 | -1.17                    | -2.96           | 29.26 | 0.0060  |
| SB02048B1H04.f1.A   | Gga.21184  | CDK2AP1     | CDK2-associated protein 1                                              | -1.17                    | -2.86           | 29.26 | 0.0077  |
| SB02040A1C05.f1     | Gga.21287  | PSMD12      | Proteasome 26S subunit, non-ATPase, 12                                 | -1.16                    | -3.30           | 29.26 | 0.0025  |
| SB03036B2G12.f1     | Gga.41955  | ACTR3       | ARP3 actin-related protein 3 homolog                                   | -1.16                    | -2.94           | 29.26 | 0.0063  |
| SB03013A2H10.f1     | Gga.12538  | PSMD1       | 26S proteasome non-ATPase regulatory subunit 1                         | -1.16                    | -2.85           | 29.26 | 0.0078  |
| SB03023B1F01.f1     | Hs.517792  | VHL         | Von Hippel-Lindau syndrome                                             | -1.16                    | -3.34           | 29.26 | 0.0023  |
| SB02025A2G06.f1     | Gga.41380  | RGPD2       | Similar to RanBP2 (Ran-binding protein 2)                              | -1.14                    | -2.97           | 29.26 | 0.0058  |
| SB03008A1C01.f1     | Hs.705605  | TMEM110     | Transmembrane protein 110                                              | 1.12                     | 2.78            | 29.26 | 0.0094  |
| SB02027B2F07.f1     | Hs.66194   | CTXN3       | Cortexin 3                                                             | 1.14                     | 3.10            | 29.26 | 0.0043  |
| SB03019B1B07.f1     |            |             |                                                                        | 1.14                     | 3.27            | 29.26 | 0.0028  |
| SB03028A2F06.f1     | Gga.1080   | MTHFD1      | Methylenetetrahydrofolate dehydrogenase 1                              | 1.15                     | 3.03            | 29.26 | 0.0051  |
| SB010002000G02      | Gga.838    | ATP12A      | ATPase, H+/K+ transporting, nongastric, alpha polypeptide              | 1.15                     | 2.85            | 29.26 | 0.0080  |
| SB03031B2G07.f1     | Gga.34829  | EXOC4       | Exocyst complex component 4                                            | 1.15                     | 3.06            | 29.26 | 0.0048  |

|                   |           |           |                                                                         |      |      |       |        |
|-------------------|-----------|-----------|-------------------------------------------------------------------------|------|------|-------|--------|
| SB02016A2E02.f1   | Hs.119598 | RPL3      | Ribosomal protein L3 (RPL3)                                             | 1.15 | 2.90 | 29.26 | 0.0070 |
| SB03025A1G04.f2   | Gga.41022 | IRS1      | Insulin receptor substrate 1                                            | 1.15 | 2.91 | 29.26 | 0.0069 |
| SB03035B2F07.f1   | Hs.428214 | MAML2     | Mastermind like 2                                                       | 1.16 | 2.84 | 29.26 | 0.0081 |
| SB02028B2D07.f1.A | Gga.39472 | H1FX      | Similar to histone H1x                                                  | 1.16 | 2.93 | 29.26 | 0.0065 |
| SB02041A2A07.f1   | Gga.40225 | ADCYAP1R1 | Adenylate cyclase activating polypeptide 1 (pituitary) receptor type I  | 1.16 | 2.84 | 29.26 | 0.0082 |
| SB03045A1G01.f1   | Gga.4205  | RTN4      | Reticulon 4                                                             | 1.16 | 2.85 | 29.26 | 0.0080 |
| SB020001000D12    | Gga.37351 | RNF2      | Ring finger protein 2                                                   | 1.17 | 2.76 | 29.26 | 0.0100 |
| SB03044B2G04.f1   | Gga.4613  | APP       | Amyloid beta (A4) precursor protein                                     | 1.17 | 3.08 | 29.26 | 0.0045 |
| SB03035A2F02.f1   | Gga.11550 | FAM49A    | Family with sequence similarity 49, member A                            | 1.17 | 3.24 | 29.26 | 0.0030 |
| SB03003B2G04.f1.A |           |           |                                                                         | 1.18 | 2.98 | 29.26 | 0.0058 |
| SB02029B2H06.f1   | Gga.6309  | TNK2      | Tyrosine kinase, non-receptor, 2                                        | 1.18 | 2.88 | 29.26 | 0.0074 |
| SB010021000E09    | Gga.35108 | NDRG4     | NDRG family member 4                                                    | 1.18 | 2.85 | 29.26 | 0.0079 |
| SB02011B2D05.f1   | Gga.8859  | RNMTL1    | RNA methyltransferase like 1                                            | 1.18 | 2.85 | 29.26 | 0.0079 |
| SB03033A2B11.f1   | Gga.10836 | AKAP7     | A kinase (PRKA) anchor protein 7                                        | 1.18 | 2.99 | 29.26 | 0.0057 |
| SB02043B1C02.f1   |           |           |                                                                         | 1.19 | 2.76 | 29.26 | 0.0100 |
| SB03024B2G08.f1   | Gga.12043 | PALMD     | Palmdelphin                                                             | 1.20 | 2.78 | 27.26 | 0.0098 |
| SB02035A2G01.f1   | Gga.30146 | CEND1     | Cell cycle exit and neuronal differentiation 1                          | 1.20 | 2.78 | 29.26 | 0.0093 |
| SB010020000G11    | Hs.656271 | SPG11     | Spastic paraplegia 11                                                   | 1.20 | 2.79 | 29.26 | 0.0092 |
| SB02015A2H07.f1   | Gga.35123 | ANK2      | Ankyrin 2, neuronal                                                     | 1.20 | 2.77 | 29.26 | 0.0095 |
| SB02022B1A07.f1   | Gga.10425 | VSNL1     | Visinin-like 1                                                          | 1.20 | 3.10 | 29.26 | 0.0042 |
| SB02042A1G08.f1.B | Gga.10799 | SFT2D2    | SFT2 domain containing 2                                                | 1.21 | 2.83 | 29.26 | 0.0083 |
| SB03046B1H08.f1   |           |           |                                                                         | 1.21 | 3.03 | 29.26 | 0.0051 |
| SB03020B2F08.f1   | Gga.42897 | ENAH      | Enabled homolog                                                         | 1.21 | 2.86 | 29.26 | 0.0077 |
| SB010023000F01    | Gga.11998 | TPRKB     | TP53RK binding protein                                                  | 1.21 | 2.79 | 29.26 | 0.0092 |
| SB03038A2C12.f1   | Gga.4833  | PAPD1     | PAP associated domain containing 1                                      | 1.21 | 3.48 | 29.26 | 0.0016 |
| SB03004A1H02.f1   | Gga.1345  | YTHDC2    | YTH domain containing 2                                                 | 1.22 | 3.08 | 29.26 | 0.0045 |
| SB03044B1B07.f1   | Gga.21204 | HSPA4L    | Heat shock 70kDa protein 4-like                                         | 1.22 | 3.03 | 29.26 | 0.0050 |
| SB03016A2D05.f1   | Gga.33604 | DUSP15    | dual specificity phosphatase 15                                         | 1.22 | 4.13 | 29.26 | 0.0003 |
| SB03032A1E07.f1   | Gga.20111 | PLEKHG1   | Pleckstrin homology domain containing, family G (with RhoGef domain) me | 1.22 | 2.86 | 29.26 | 0.0077 |
| SB02023A2A01.f1   | Gga.9753  | MRPS17    | Mitochondrial ribosomal protein S17                                     | 1.22 | 2.79 | 29.26 | 0.0091 |
| SB02015A2E08.f1   | Gga.16354 | ATG4B     | Autophagy related 4 homolog B                                           | 1.22 | 3.01 | 29.26 | 0.0053 |
| SB02047B1G03.f1   | Gga.4795  | KLHDC2    | Kelch domain containing 2                                               | 1.22 | 2.80 | 29.26 | 0.0090 |
| SB03045A2E02.f1   | Gga.22008 | SUCLA2    | Succinate-CoA ligase, ADP-forming, beta subunit                         | 1.22 | 3.73 | 29.26 | 0.0008 |
| SB02044B1C10.f1   | Hs.9911   | C12orf44  | Chromosome 12 open reading frame 44                                     | 1.22 | 2.86 | 29.26 | 0.0077 |
| SB03023B2E01.f1.B | Gga.2627  | NDUFAB1   | NADH dehydrogenase (ubiquinone) 1, alpha/beta subcomplex,1              | 1.22 | 3.32 | 29.26 | 0.0024 |
| SB03013A2A05.f1   | Gga.41623 | CDK15     | Cyclin-dependent kinase-like 5                                          | 1.22 | 2.90 | 29.26 | 0.0070 |
| SB03037B2G11.f1   | Gga.6172  | INPP5F    | Inositol polyphosphate-5-phosphatase F                                  | 1.23 | 3.10 | 29.26 | 0.0042 |
| SB02035B2A03.f1   | Hs.113874 | OMG       | Oligodendrocyte-myelin glycoprotein                                     | 1.23 | 3.48 | 29.26 | 0.0016 |
| SB010018000E11    | Gga.2011  | CLP1      | Cleavage and polyadenylation factor I subunit, homolog                  | 1.23 | 3.36 | 29.26 | 0.0022 |
| SB03046B1B01.f1   | Gga.12246 | FEZ1      | Fasciculation and elongation protein zeta 1                             | 1.23 | 3.02 | 29.26 | 0.0052 |
| SB02016B1D09.f1   | Gga.8976  | ATG9A     | ATG9 autophagy related 9 homolog A                                      | 1.23 | 3.27 | 29.26 | 0.0028 |
| SB03002A1G09.f1   | Gga.21295 | NUP85     | Nucleoporin 85kDa                                                       | 1.23 | 3.15 | 29.26 | 0.0038 |
| SB02039A1D05.f1   | Gga.1527  | METTL7A   | Methyltransferase like 7A                                               | 1.24 | 3.01 | 29.26 | 0.0053 |
| SB02049A2D10.f1   | Gga.6269  | FARSB     | Phenylalanyl-tRNA synthetase, beta subunit                              | 1.24 | 3.09 | 29.26 | 0.0043 |
| SB02011A1C10.f1   | Hs.301654 | KIAA1024  | KIAA1024                                                                | 1.25 | 2.83 | 29.26 | 0.0084 |
| SB02027B2E05.f1   | Gga.2942  | LAMP2     | Lysosomal-associated membrane protein 2                                 | 1.25 | 3.62 | 29.26 | 0.0011 |
| SB02028A1D07.f1   |           |           |                                                                         | 1.25 | 3.72 | 29.26 | 0.0009 |
| SB02048A2C02.f1   | Gga.7650  | GSK3B     | Glycogen synthase kinase 3 beta                                         | 1.25 | 3.53 | 29.26 | 0.0014 |
| SB02030B1B09.f1   | Gga.38006 | PLXDC2    | Plexin domain containing 2                                              | 1.25 | 2.77 | 29.26 | 0.0096 |
| SB03040A2C03.f1   | Hs.705605 | TMEM110   | Transmembrane protein 110                                               | 1.26 | 2.89 | 29.26 | 0.0072 |
| SB02044B2C12.f1   | Gga.23874 | RASGRF1   | RAS protein-specific guanine nucleotide-releasing factor 1              | 1.26 | 3.15 | 29.26 | 0.0038 |
| SB03024A1B09.f1.A | Gga.1327  | C9orf119  | Chromosome 9 open reading frame 119                                     | 1.26 | 2.87 | 29.26 | 0.0075 |
| SB02030B2D07.f1   | Gga.12977 | DBP1      | Damage-specific DNA binding protein 1, 127kDa                           | 1.27 | 3.34 | 29.26 | 0.0023 |
| SB03002B2B03.f1   | Gga.4833  | PAPD1     | PAP associated domain containing 1                                      | 1.27 | 2.93 | 29.26 | 0.0066 |
| SB03003A1D04.f1   | Gga.18371 | LARP6     | La ribonucleoprotein domain family, member 6                            | 1.27 | 2.80 | 29.26 | 0.0089 |
| SB02035B1E09.f1   | Gga.22322 | STXBP3    | Syntaxin binding protein 3                                              | 1.27 | 3.28 | 29.26 | 0.0027 |
| SB03022A2C10.f1   | Hs.2178   | HIST2H2BE | Histone cluster 2, H2be                                                 | 1.27 | 2.97 | 29.26 | 0.0059 |
| SB03031A2C12.f1   | Gga.16427 | USP14     | Ubiquitin carboxyl-terminal hydrolase 14                                | 1.27 | 3.13 | 29.26 | 0.0039 |
| SB02020A2F10.f1   | Gga.37123 | VWA1      | Von Willebrand factor A domain containing 1                             | 1.28 | 3.39 | 29.26 | 0.0020 |
| SB02012A2H03.f1   | Gga.3003  | PRKRIP1   | PRKR interacting protein 1                                              | 1.29 | 3.68 | 29.26 | 0.0009 |
| SB02031B2D01.f1   | Hs.501857 | DENND5A   | DENN/MADD domain containing 5A                                          | 1.30 | 3.30 | 29.26 | 0.0025 |
| SB02038B2E05.f1   | Hs.658489 | CLCC1     | Chloride channel CLIC-like protein 1 Precursor                          | 1.30 | 3.34 | 29.26 | 0.0023 |
| SB03047A1D09.f1   | Gga.28074 | MUTYH     | MutY homolog                                                            | 1.31 | 3.79 | 29.26 | 0.0007 |
| SB02037A1B10.f1   | Gga.22887 | NR2F6     | Nuclear receptor subfamily 2, group F, member 6                         | 1.31 | 3.20 | 29.26 | 0.0033 |
| SB02040A1H09.f1   |           |           |                                                                         | 1.31 | 3.05 | 29.26 | 0.0048 |
| SB03037A1F03.f1   | Gga.39722 | B3GALNT2  | Beta-1,3-N-acetylgalactosaminyltransferase 2                            | 1.32 | 3.50 | 29.26 | 0.0015 |
| SB02006B2F02.f1   | Gga.2240  | FREQ      | Frequenin homolog                                                       | 1.33 | 3.07 | 29.26 | 0.0046 |
| SB03023A1F08.f1   | Hs.651849 | FAM38B2   | Family with sequence similarity 38, member B2                           | 1.34 | 2.98 | 29.26 | 0.0057 |
| SB02008B1D10.f1   | Gga.1509  | PRPF3     | PRP3 pre-mRNA processing factor 3 homolog                               | 1.34 | 2.83 | 29.26 | 0.0084 |
| SB02029B2D06.f1   | Gga.2155  | ATP1A1    | ATPase, Na+/K+ transporting, alpha 1 polypeptide                        | 1.34 | 3.31 | 29.26 | 0.0025 |
| SB03044A2E05.f1   | Gga.20682 | CORO2A    | Coronin, actin binding protein, 2A                                      | 1.35 | 3.52 | 29.26 | 0.0014 |
| SB03007A1F01.f1   | Hs.369104 | C3orf57   | Similar to ADMP                                                         | 1.36 | 3.10 | 29.26 | 0.0043 |
| SB02013B1A09.f1   | Gga.44170 | PTTG1IP   | Pituitary tumor-transforming 1 interacting protein                      | 1.36 | 3.71 | 29.26 | 0.0009 |
| SB03043B1D01.f1   | Gga.12424 | KIF2A1    | Kinesin family member 21A                                               | 1.37 | 3.39 | 29.26 | 0.0020 |
| SB03035A2F09.f1   | Gga.17167 | GABRA1    | Gamma-aminobutyric acid (GABA) A receptor, alpha 1                      | 1.39 | 2.98 | 29.26 | 0.0057 |
| SB02006A2B03.f1   | Gga.21290 | WDR70     | WD repeat domain 70                                                     | 1.39 | 2.90 | 29.26 | 0.0071 |
| SB02013B1F07.f1   | Gga.2421  | DIP2B     | Disco-interacting protein 2 homolog B                                   | 1.39 | 3.05 | 28.26 | 0.0050 |
| SB03046A2B05.f1   | Hs.501857 | DENND5A   | DENN/MADD domain containing 5A                                          | 1.39 | 3.19 | 29.26 | 0.0034 |
| SB02018B2C06.f1   | Gga.22154 | PAQR8     | Progesterin and adipoQ receptor family member VIII                      | 1.41 | 3.50 | 29.26 | 0.0015 |
| SB03049A1D01.f1   | Gga.25612 | POLG2     | Polymerase, gamma 2, accessory subunit                                  | 1.42 | 2.88 | 29.26 | 0.0074 |
| SB03024B1C04.f1   | Gga.20183 | IARS      | Isoleucyl-tRNA synthetase                                               | 1.48 | 2.87 | 29.26 | 0.0076 |
| SB02008A1E12.f1   | Gga.28050 | LOC777232 | Similar to MGC81165 protein                                             | 1.49 | 3.30 | 29.26 | 0.0026 |
| SB03006A2H08.f1   | Gga.42149 | ATRN      | Attractin                                                               | 1.49 | 2.80 | 29.26 | 0.0090 |
| SB03026A1B07.f1   | Gga.7850  | ABCB10    | ATP-binding cassette, sub-family B (MDR/TAP), member 10                 | 1.51 | 3.20 | 29.26 | 0.0033 |
| SB03025B2G12.f2   | Gga.43069 | ALDH4A1   | Aldehyde dehydrogenase 4 family, member A1                              | 1.52 | 2.90 | 29.26 | 0.0071 |

|                   |          |       |                                                          |      |      |       |        |
|-------------------|----------|-------|----------------------------------------------------------|------|------|-------|--------|
| SB02036B1D07.f1   |          |       |                                                          | 1.71 | 3.18 | 29.26 | 0.0035 |
| SB03042A2E11.f1   |          |       |                                                          | 1.72 | 2.98 | 29.26 | 0.0057 |
| SB03045B1C07.f1   |          |       |                                                          | 1.78 | 3.09 | 29.26 | 0.0044 |
| SB03039B1G08.f1.A | Gga.5250 | HDHD3 | Haloacid dehalogenase-like hydrolase domain containing 3 | 1.87 | 2.76 | 29.26 | 0.0099 |
| SB03002A2H02.f1   |          |       |                                                          | 2.28 | 2.89 | 29.26 | 0.0072 |
