# Supplementary material for: Seasonal Differences of Gene Expression Profiles in Song Sparrow (Melospiza melodia) Hypothalamus in Relation to Territorial Aggression
Source: PubMed Central journal article supplement (PMC2780717; doi:10.1371/journal.pone.0008182), 2009-12-04
Supplement: pone.0008182.s005.pdf [file pone.0008182.s005.pdf]

| Spot ID           | Unigene_ID | HGNC_symbol | Gene Description                                                          | Fold Change<br>SE vs.SC | Fold Change<br>AE vs. AC | T<br>statistics | df    | P-value |
|-------------------|------------|-------------|---------------------------------------------------------------------------|-------------------------|--------------------------|-----------------|-------|---------|
| SB02008A1D12.f1   | Hs.404088  | HAUS8       | HAUS augmin-like complex, subunit 8                                       | -1.33                   | 1.13                     | 3.00            | 29.26 | 0.0054  |
| SB02032B1D07.f2   | Gga.6044   | FAM175A     | Family with sequence similarity 175, member A                             | -1.33                   | 1.34                     | 3.39            | 29.26 | 0.0020  |
| SB03026A1B07.f1   | Gga.7850   | ABCB10      | ATP-binding cassette, sub-family B, member 10                             | -1.30                   | 1.51                     | 3.60            | 29.26 | 0.0012  |
| SB03025B1H05.f2   | Hs.590869  | NTSR1       | Neurotensin receptor 1                                                    | -1.29                   | 1.14                     | 4.11            | 29.26 | 0.0003  |
| SB03032B2E06.f1   | Gga.11322  | STXBP1      | Syntaxin binding protein 1                                                | -1.27                   | 1.13                     | 2.77            | 29.26 | 0.0097  |
| SB03032B2A09.f1   | Gga.43154  | EHBP1       | EH domain binding protein 1                                               | -1.24                   | 1.17                     | 3.07            | 29.26 | 0.0046  |
| SB02034A2D11.f1.A | Gga.29328  | TP53BP2     | Tumor protein p53 binding protein, 2                                      | -1.24                   | 1.52                     | 2.76            | 29.26 | 0.0098  |
| SB03029B1A06.f1   |            |             |                                                                           | -1.24                   | 1.09                     | 2.76            | 29.26 | 0.0099  |
| SB02016B1C02.f1   | Gga.5145   | CDV3        | CDV3 homolog                                                              | -1.22                   | 1.26                     | 3.13            | 29.26 | 0.0040  |
| SB02023A2E10.f1   | Gga.4296   | CLK3        | Dual specificity protein kinase CLK3                                      | -1.21                   | 1.06                     | 2.78            | 29.26 | 0.0094  |
| SB03004A1H08.f1   | Gga.1225   | CCT6A       | Chaperonin containing TCP1, subunit 6A                                    | -1.21                   | 1.14                     | 3.33            | 29.26 | 0.0024  |
| SB02030A2H08.f1   | Gga.24273  | CDH13       | Cadherin-13 precursor                                                     | -1.21                   | 1.33                     | 3.13            | 29.26 | 0.0039  |
| SB02006A2E03.f1   | Gga.25128  | COX5B       | Cytochrome c oxidase polypeptide Vb (VI)                                  | -1.21                   | 1.22                     | 3.06            | 29.26 | 0.0047  |
| SB02041B2A07.f1   |            |             |                                                                           | -1.20                   | 1.24                     | 3.10            | 29.26 | 0.0043  |
| SB03003A1E11.f1   | Gga.17826  | OXCT1       | 3-oxoacid CoA transferase 1                                               | -1.20                   | 1.08                     | 3.24            | 29.26 | 0.0030  |
| SB02041A1A03.f1   | Gga.22563  | KRR1        | KRR1, small subunit (SSU) processome component                            | -1.18                   | 1.13                     | 4.03            | 29.26 | 0.0004  |
| SB02048A2E09.f1   | Hs.506989  | RFC5        | Replication factor C (activator 1) 5                                      | -1.18                   | 1.20                     | 2.93            | 29.26 | 0.0066  |
| SB03013A2A07.f1   |            |             |                                                                           | -1.18                   | 1.14                     | 3.07            | 29.26 | 0.0046  |
| SB02018B2E03.f1.A | Gga.5189   | TTC19       | Tetrapeptide repeat protein 19                                            | -1.18                   | 1.11                     | 2.85            | 29.26 | 0.0080  |
| SB03002A1G08.f1   | Gga.37302  | TMEM45B     | Transmembrane protein 45a                                                 | -1.17                   | 1.21                     | 2.98            | 29.26 | 0.0058  |
| SB02035B2A03.f1   | Hs.113874  | OMG         | Oligodendrocyte myelin glycoprotein                                       | -1.16                   | 1.23                     | 4.16            | 29.26 | 0.0003  |
| SB03036B1H10.f1   | Hs.91622   | NPTXR       | Neuronal pentraxin receptor                                               | -1.16                   | 1.12                     | 3.28            | 29.26 | 0.0027  |
| SB02014A1G07.f2   | Gga.33766  | MAN2A2      | Alpha-mannosidase lix                                                     | -1.16                   | 1.26                     | 2.90            | 29.26 | 0.0071  |
| SB02020A1A04.f1   | Gga.22901  | PRC1        | Protein regulator of cytokinesis 1                                        | -1.16                   | 1.11                     | 2.77            | 29.26 | 0.0097  |
| SB02014B1A01.f1   | Gga.2375   | CTNNA2      | Catenin (cadherin-associated protein), alpha 2                            | -1.15                   | 1.16                     | 2.97            | 29.26 | 0.0059  |
| SB03022A2B10.f1   | Gga.32082  | IRS1        | Insulin receptor substrate 2 (IRS-2)                                      | -1.15                   | 1.09                     | 3.13            | 29.26 | 0.0039  |
| SB03035A2C12.f1   | Gga.30037  | CAND1       | Cullin-associated and neddylation-dissociated 1                           | -1.15                   | 1.28                     | 2.80            | 29.26 | 0.0090  |
| SB03020A2D12.f1   | Gga.39562  | TBC1D20     | TBC1 domain family, member 20                                             | -1.14                   | 1.19                     | 2.80            | 29.26 | 0.0090  |
| SB02008B1H12.f1   | Hs.670146  | CACNG2      | Calcium channel, voltage-dependent, gamma subunit 2                       | -1.14                   | 1.24                     | 2.87            | 29.26 | 0.0075  |
| SB03004A1H02.f1   | Gga.1345   | YTHDC2      | YTH domain containing 2                                                   | -1.14                   | 1.22                     | 3.55            | 29.26 | 0.0013  |
| SB03041B1A02.f1.A | Gga.10026  | VPS37B      | Vacuolar protein sorting 37 homolog B                                     | -1.14                   | 1.14                     | 2.91            | 29.26 | 0.0069  |
| SB03013A2E02.f1   | Gga.229    | HINT1       | Histidine triad nucleotide binding protein 1                              | -1.12                   | 1.09                     | 2.76            | 29.26 | 0.0099  |
| SB03043B1D01.f1   | Gga.12424  | KIF21A      | Kinesin family member 21A                                                 | -1.12                   | 1.37                     | 3.16            | 29.26 | 0.0036  |
| SB03038B1B08.f1   | Gga.2489   | SLC39A9     | Solute carrier family 39 (zinc transporter), member 9                     | -1.11                   | 1.11                     | 2.91            | 29.26 | 0.0069  |
| SB02029B2D06.f1   | Gga.2155   | ATP1A1      | ATPase, Na <sup>+</sup> /K <sup>+</sup> transporting, alpha 1 polypeptide | -1.11                   | 1.34                     | 3.08            | 29.26 | 0.0045  |
| SB02016B1D09.f1   | Gga.8976   | ATG9A       | ATG9 autophagy related 9 homolog A                                        | -1.10                   | 1.23                     | 3.33            | 29.26 | 0.0024  |
| SB03013B2G07.f1   | Gga.5818   | MRPL51      | Mitochondrial ribosomal protein L51                                       | -1.10                   | 1.12                     | 2.78            | 29.26 | 0.0094  |
| SB020001000D12    | Gga.37351  | RNF2        | Ring finger protein 2                                                     | -1.10                   | 1.17                     | 3.09            | 29.26 | 0.0043  |
| SB02043B1C02.f1   |            |             |                                                                           | -1.09                   | 1.19                     | 2.83            | 29.26 | 0.0083  |
| SB02031B2D01.f1   | Hs.501857  | DENND5A     | DENN/MADD domain containing 5A                                            | -1.09                   | 1.30                     | 3.03            | 29.26 | 0.0051  |
| SB03035A2F02.f1   | Gga.11550  | FAM49A      | Family with sequence similarity 49, member A                              | -1.07                   | 1.17                     | 3.23            | 29.26 | 0.0031  |
| SB03002A1G09.f1   | Gga.21295  | NUP85       | Nucleoporin 85kDa                                                         | -1.06                   | 1.23                     | 2.78            | 29.26 | 0.0094  |
| SB03023A2B06.f1   | Gga.1184   | PSMB4       | Proteasome subunit beta type 4 precursor                                  | 1.05                    | -1.21                    | -3.21           | 29.26 | 0.0032  |
| SB02040A1C05.f1   | Gga.21287  | PSMD12      | Proteasome 26S subunit, non-ATPase, 12                                    | 1.06                    | -1.16                    | -3.13           | 29.26 | 0.0040  |
| SB03002A2E10.f1   | Gga.22662  | PLTP        | Phospholipid transfer protein precursor                                   | 1.06                    | -1.21                    | -2.85           | 29.26 | 0.0079  |
| SB02009B2F04.f1   | Gga.5775   | HNRNPA3     | Heterogeneous nuclear ribonucleoprotein                                   | 1.07                    | -1.19                    | -3.70           | 29.26 | 0.0009  |
| SB02016B1C07.f1   | Gga.9325   | UBE2T       | Ubiquitin-conjugating enzyme E2 T                                         | 1.08                    | -1.18                    | -2.79           | 29.26 | 0.0091  |
| SB03033B1H08.f1   | Gga.28477  | PAPD5       | PAP associated domain containing 5                                        | 1.11                    | -1.18                    | -2.90           | 29.26 | 0.0071  |
| SB02031A1E06.f1   | Gga.8788   | SLC25A29    | Solute carrier family 25, member 29                                       | 1.11                    | -1.20                    | -3.02           | 29.26 | 0.0052  |
| SB02016B2D05.f1   |            |             |                                                                           | 1.12                    | -1.10                    | -2.78           | 29.26 | 0.0094  |
| SB02012A1E02.f1   | Hs.375837  | C10orf93    | Putative uncharacterized protein C10orf93                                 | 1.12                    | -1.17                    | -2.80           | 29.26 | 0.0090  |
| SB02027A2B05.f1   | Gga.15424  | WDSOF1      | WD repeats and SOF1 domain containing                                     | 1.13                    | -1.16                    | -2.76           | 29.26 | 0.0098  |
| SB03018A2G04.f1   | Gga.39790  | ARF5        | ADP-ribosylation factor 4                                                 | 1.15                    | -1.11                    | -2.83           | 28.26 | 0.0085  |
| SB02049A1B07.f1   | Gga.16420  | N4BP1       | Nedd4 binding protein 1                                                   | 1.16                    | -1.24                    | -2.85           | 29.26 | 0.0080  |
| SB010003000H07    | Gga.16842  | SPCS1       | Signal peptidase complex subunit 1                                        | 1.16                    | -1.10                    | -2.90           | 29.26 | 0.0070  |
| SB02022A2D12.f1   | Gga.12569  | FNBP1L      | Formin binding protein 1-like                                             | 1.16                    | -1.17                    | -4.68           | 29.26 | 0.0001  |
| SB03048A2C01.f1   | Gga.5407   | TCEA2       | Transcription elongation factor A (SII), 2                                | 1.18                    | -1.25                    | -3.00           | 29.26 | 0.0054  |
| SB03028B1D02.f1   | Gga.42380  | AMFR        | Autocrine motility factor receptor                                        | 1.18                    | -1.11                    | -3.20           | 29.26 | 0.0033  |
| SB03031B2E01.f1   | Gga.10459  | CCDC72      | coiled-coil domain containing 72                                          | 1.19                    | -1.08                    | -2.85           | 27.26 | 0.0082  |
| SB02026B1E10.f1   | Gga.22421  | PDZD11      | PDZ domain containing protein 11                                          | 1.20                    | -1.12                    | -2.85           | 29.26 | 0.0079  |
| SB02038B1E05.f1   |            |             |                                                                           | 1.21                    | -1.07                    | -2.88           | 29.26 | 0.0075  |
| SB03017A1B05.f1   | Gga.5902   | ORMDL2      | ORM1-like protein 2 (Adoplin-2)                                           | 1.23                    | -1.07                    | -2.97           | 29.26 | 0.0059  |
| SB010009001H01    | Gga.3222   | LIMK2       | LIM domain kinase 2                                                       | 1.23                    | -1.12                    | -3.36           | 29.26 | 0.0022  |
| SB02036B1C11.f1   | Gga.34693  | PION        | Protein pigeon homolog                                                    | 1.23                    | -1.13                    | -2.92           | 29.26 | 0.0066  |
| SB03034B1C11.f1.A |            |             |                                                                           | 1.24                    | -1.06                    | -2.76           | 29.26 | 0.0100  |
| SB03015B1E05.f1   |            |             |                                                                           | 1.24                    | -1.09                    | -3.16           | 29.26 | 0.0037  |
| SB03046A2A02.f1   | Gga.21371  | NIT2        | Nitrilase family, member 2                                                | 1.26                    | -1.48                    | -2.91           | 29.26 | 0.0068  |
| SB03014B1B02.f1   | Gga.30662  | PEX13       | Peroxisome biogenesis factor 13                                           | 1.27                    | -1.10                    | -4.03           | 28.26 | 0.0004  |
| SB03048A2G09.f1   |            |             |                                                                           | 1.27                    | -1.31                    | -3.70           | 29.26 | 0.0009  |
| SB02046B2A12.f1   | Gga.4136   | Gpc5        | Glypican-5 precursor                                                      | 1.32                    | 1.01                     | -2.92           | 29.26 | 0.0067  |
| SB03031A2G05.f1   | Gga.15373  | DDX31       | Probable ATP-dependent RNA helicase DDX3                                  | 1.32                    | -1.20                    | -3.98           | 29.26 | 0.0004  |
| SB03032B2E02.f1   | Gga.2852   | ACVR2A      | Activin receptor type 2 precursor                                         | 1.33                    | -1.07                    | -2.77           | 29.26 | 0.0096  |
| SB03048B2D08.f1.A | Gga.8180   | HMGN3       | High mobility group nucleosomal binding domain 3                          | 1.33                    | -1.25                    | -2.86           | 29.26 | 0.0077  |
| SB03046B2A03.f1   | Hs.370303  | ZNF366      | Zinc finger protein 366                                                   | 1.36                    | -1.08                    | -2.77           | 29.26 | 0.0095  |
| SB03024B1A12.f1   | Gga.32314  | SLC38A4     | Solute carrier family 38, member 4                                        | 1.37                    | -1.21                    | -2.81           | 29.26 | 0.0087  |
| SB02014A2B08.f2   |            |             |                                                                           | 1.39                    | -1.16                    | -2.87           | 29.26 | 0.0076  |
| SB03006A1B07.f1   | Gga.944    | CENPH       | Centromere protein H                                                      | 1.39                    | -1.40                    | -3.23           | 29.26 | 0.0030  |
| SB03002A2F12.f1   | Gga.23549  | AGXT2L1     | Alanine-glyoxylate aminotransferase 2-like 1                              | 1.48                    | 1.00                     | -2.76           | 29.26 | 0.0099  |
| SB03046A2G09.f1   |            |             |                                                                           | 1.67                    | -1.68                    | -2.92           | 29.26 | 0.0067  |
| SB03036B1C02.f1   | Gga.5101   | ZBTB16      | Zinc finger and BTB domain containing 16                                  | 1.71                    | 1.14                     | -3.06           | 29.26 | 0.0047  |
| SB02032A2C07.f2   | Gga.30876  | DMAP1       | DNA methyltransferase 1 associated protein 1                              | 1.75                    | -1.41                    | -2.82           | 29.26 | 0.0085  |
| SB02027A2C02.f1   | Gga.40320  | GLP2R       | Glucagon-like peptide 2 receptor Precursor                                | 1.77                    | -1.10                    | -3.58           | 29.26 | 0.0012  |

|                 |           |         |                                              |      |       |       |       |        |
|-----------------|-----------|---------|----------------------------------------------|------|-------|-------|-------|--------|
| SB03034B2D05.f1 | Gga.5101  | ZBTB16  | Zinc finger and BTB domain containing 16     | 1.86 | 1.00  | -3.45 | 29.26 | 0.0017 |
| SB02022A2D01.f1 | Gga.11726 | GADD45B | Growth arrest and DNA-damage-inducible, beta | 2.16 | 1.16  | -3.02 | 29.26 | 0.0053 |
| SB03038B1F04.f1 | Gga.2620  | TTR     | Transthyretin precursor                      | 5.41 | -2.96 | -2.83 | 29.26 | 0.0083 |
| SB02032B2F01.f2 | Gga.2620  | TTR     | Transthyretin precursor                      | 5.90 | -2.88 | -2.79 | 29.26 | 0.0092 |
| SB02026B2H07.f1 | Gga.2620  | TTR     | Transthyretin precursor                      | 6.32 | -2.84 | -2.78 | 29.26 | 0.0093 |
| SB02015A2G08.f1 | Gga.2620  | TTR     | Transthyretin precursor                      | 6.95 | -3.55 | -2.97 | 29.26 | 0.0058 |
